1        **Inhibition of the H3K27 demethylase UTX enhances the epigenetic**  
2        **silencing of HIV proviruses and induces HIV-1 DNA hypermethylation**  
3                    **but fails to permanently block HIV reactivation**

4  
5        **Kien Nguyen\***, **Curtis Dobrowolski<sup>#a</sup>**, **Meenakshi Shukla**, **Won-Kyung Cho<sup>#b</sup>**, &  
6        **Jonathan Karn**

7                    Department of Molecular Biology and Microbiology, Case Western Reserve  
8                    University Medical School, Cleveland, Ohio, United States of America

9  
10  
11        <sup>#a</sup>Current address: Wallace H. Coulter Department of Biomedical Engineering, Georgia  
12        Institute of Technology and Emory School of Medicine, Atlanta, Georgia, United States of  
13        America

14        <sup>#b</sup> Korean Medicine (KM)-Application Center, Korea Institute of Oriental Medicine (KIOM),  
15        70 Cheomdan-ro, Dong-gu, Daegu 41062, Republic of Korea

16        \*Corresponding author

17        E-mail: [Kien.Nguyen@case.edu](mailto:Kien.Nguyen@case.edu)

18

19

20        **Short Title:** Enhanced histone and DNA methylation does not block HIV reactivation

21

## 22 **Abstract**

23           One strategy for a functional cure of HIV-1 is “block and lock”, which seeks to  
24 permanently suppress the rebound of quiescent HIV-1 by epigenetic silencing. For the  
25 HIV LTR, both histone 3 lysine 27 tri-methylation (H3K27me3) and DNA methylation are  
26 associated with viral suppression, while H3K4 tri-methylation (H3K4me3) is correlated  
27 with viral expression. However, H3K27me3 is readily reversed upon activation of T-cells  
28 through the T-cell receptor. To suppress latent HIV-1 in a stable fashion, we depleted the  
29 expression or inhibited the activity of UTX/KDM6A, the major H3K27 demethylase, and  
30 investigated its impact on latent HIV-1 reactivation in T cells. Inhibition of UTX  
31 dramatically enhanced H3K27me3 levels at the HIV LTR and were associated with  
32 increased DNA methylation. In latently infected cells from patients, GSK-J4, which is a  
33 potent dual inhibitor of the H3K27me3/me2-demethylases JMJD3/KDM6B and  
34 UTX/KDM6A, effectively suppressed the reactivation of latent HIV-1 and induced DNA  
35 methylation at specific sites in the 5’LTR of latent HIV-1 by the enhanced recruitment of  
36 DNMT3A to HIV-1. Nonetheless, suppression of HIV-1 through epigenetic silencing  
37 required the continued treatment with GSK-J4 and was rapidly reversed after removal of  
38 the drug. Thus, epigenetic silencing by itself appears to be insufficient to permanently  
39 silence HIV-1 proviral transcription.

40

## 41 **Author Summary**

42           The “block and lock” strategy for a functional HIV-1 cure is based on the premise  
43 that permanent inactivation of the HIV-1 can be achieved by epigenetic silencing of the  
44 proviral DNA. For cellular genes, long-term silencing is achieved during cell differentiation  
45 by the induction of specific epigenetic modifications involving histone and DNA  
46 methylation. During HIV-1 silencing, histone methylation and DNA methylation are  
47 observed, but both sets of modifications can be reversed upon activation of T-cells  
48 through the T-cell receptor or potent latency reversing agents. In an attempt to enhance  
49 silencing of HIV-1 transcription, we used an inhibitor of H3K27 demethylases to increase  
50 H3K27 methylation. This in turn led to enhanced DNA methylation of HIV-1.  
51 Unfortunately, although the treatment effectively silenced HIV-1 and prevented viral  
52 reactivation, the silencing effects were short-lived and quickly reversed after removal of  
53 the drug.

## 54 **Introduction**

55           Despite effective long-term suppression of viral loads by combination antiretroviral  
56 therapy (cART), latent HIV-1 may quickly rebound upon cessation of treatment [1, 2].  
57 There are two major strategies for eliminating latent proviruses. The first, often referred  
58 to as “kick and kill” [3], is based on the concept that latent HIV-1, once pharmacologically  
59 reactivated by latency reversing agents (LRAs), could subsequently be eliminated by  
60 cytotoxicity and/or the enhanced immunological surveillance [4, 5]. Unfortunately, “kick  
61 and kill” faces formidable challenges in achieving reactivation of the majority of latent  
62 provirus [6-10] and difficulties in inducing HIV-1 specific immune-mediated clearance *in*  
63 *vivo* [11-13]. An alternative approach, referred to as “block and lock”, is designed to  
64 permanently suppress the rebound of quiescent HIV-1 by inducing epigenetic silencing  
65 [14-16]. In the best documented example of a “block and lock” strategy, the Valente  
66 laboratory has reported that didehydro-cortistatin A (dCA), an inhibitor of HIV-1  
67 transcription can enhance epigenetic silencing of the HIV-1 promoter, leading to long-  
68 term inactivation of the provirus [17-20]. Regardless of the chosen strategy, a more  
69 comprehensive understanding of the mechanism involved in HIV-1 latency is urgently  
70 required when designing effective HIV-1 cure strategies.

71           Multiple complementary molecular mechanisms contribute to the development of  
72 HIV-1 latency in T-cell populations, including sequestration of key transcription initiation  
73 and elongation factors [21]. In addition, numerous epigenetic modifications of histones on  
74 the HIV-1 LTR, including H3K27 and H3K9 methylation, serve to silence HIV-1 proviruses  
75 [22-29].

76 H3K27 trimethylation (H3K27me<sub>3</sub>) provides one of the essential silencing  
77 mechanisms of HIV-1 in CD4<sup>+</sup> T cells [23, 24, 30-33]. EZH2, the enzymatic moiety of the  
78 polycomb repressive complex 2, is the sole H3K27 methyltransferase (H3K27MT) in  
79 mammalian cells. Opposing the H3K27MT is UTX/KDM6A, one of two specific H3K27  
80 demethylases, containing highly homologous Jumonji C domains [34, 35], that selectively  
81 demethylates H3K27me<sub>3</sub> and H3K27me<sub>2</sub>. UTX is essential for the activation of  
82 transcriptionally repressed genes containing bivalent promoters [36, 37]. UTX is a  
83 component of the UTX-MLL2/3 complexes, which maintain the transcriptionally positive  
84 epigenetic mark H3K4me<sub>3</sub>.

85 In addition to histone methylation, promoters are often permanently silenced by  
86 DNA methylation, which occurs when cytosine residues are methylated by DNA  
87 methyltransferases (Dnmts) to create 5-methylcytosine (5mC) residues [38]. The majority  
88 of DNA methylation occurs at cytosine in the CpG islands [39]. Methylated DNA itself  
89 suppresses the transcription of cellular genes by eliminating the binding of transcription  
90 activators [38]. In addition, methylation of DNA also promotes the binding of methylated-  
91 DNA binding proteins which usually function as transcription co-repressors [38, 40, 41].  
92 DNA methylation of CpG islands in the promoter is usually associated with long-term  
93 transcription repression [42].

94 DNA methylation at two CpG islands flanking the transcription start site in the HIV-  
95 1 5' LTR has been associated with HIV-1 silencing [43, 44]. However, the latent viral  
96 reservoir of HAART-treated aviremic patients displays very low or no DNA methylation  
97 suggesting that direct DNA modification is not a major control mechanism for latency [45,  
98 46].

99           We reasoned that since H3K27me3 is essential for HIV-1 latency in T cells [23, 24]  
100   enhancement of H3K27me3 by inhibition of H3K27 demethylases, particularly UTX, could  
101   lead to permanent silencing of the provirus. Blocking UTX was able to prevent proviral  
102   reactivation and led to increases in both H3K27me3 and DNA methylation at specific sites  
103   in the 5' LTR. Unfortunately, this did not result in irreversible suppression of latent HIV-1  
104   in T cells, suggesting that epigenetic silencing is short-lived and cannot by itself lead to a  
105   permanent block to HIV-1 rebound.

## 106 **Results**

### 107 **Depletion of UTX expression blocks HIV-1 reactivation**

108 UTX/KDM6A is a specific H3K27 demethylase that selectively targets H3K27me3  
109 and H3K27me2. Since H3K27me3 formation by EZH2 is a powerful repressive  
110 mechanism to silence HIV-1 [23, 24], we reasoned that knockdown of UTX could be used  
111 to enhance HIV-1 transcriptional silencing and perhaps establish a permanently silenced  
112 provirus. As shown in **Fig 1**, we initially performed knockdown studies in the latently  
113 infected Jurkat E4 cell line [23, 24, 47] using two different shRNAs designed to target  
114 UTX (shUTX(1) & shUTX(2)) along with a scrambled shRNA control. The shRNAs were  
115 introduced into the E4 cells using a lentiviral expression vector and single cells were then  
116 sorted into wells to derive clones. As shown in **Fig 1A & B**, after reactivation of the latent  
117 proviruses by TNF $\alpha$  stimulation, up to 76% GFP+ cells were obtained in the cells  
118 expressing the scrambled shRNA control, while we observed less than 30% viral  
119 reactivation in two representative clones expressing two different shRNAs to UTX  
120 (shUTX-cl1; shUTX-cl2). We observed similar blocks to HIV-1 reactivation by SAHA or T  
121 cell receptor (TCR) activation (**Fig 1B**). In addition, we confirmed the inhibitory effect of  
122 UTX knockdown on HIV-1 using two other latently infected Jurkat cell lines: 3C9 cells,  
123 harboring Nef+ wild-type Tat HIV-1, and 2D10 cells, infected with Nef- H13L Tat HIV-1  
124 (**Fig 1B**).

125 To verify that the inhibition on HIV-1 reactivation was not clonally dependent,  
126 multiple clones of E4 cells transduced with either the scrambled or UTX shRNAs were  
127 reactivated using 2  $\mu$ M of SAHA overnight (**Fig 1C**). Expression of both UTX shRNA  
128 sequences not only significantly inhibited the basal transcription of provirus but also

129 prevented proviruses from being reactivated by SAHA stimulation, although the shUTX(2)  
130 sequence was somewhat less efficient than shUTX(1) in reducing expression levels of  
131 HIV-1.

132 The relative potency of the two shRNAs was verified by Western blots using a  
133 specific UTX antibody (**Fig 1D**). UTX levels were depleted by more than 70% using both  
134 UTX shRNAs, with shUTX(1) showing somewhat greater activity than shUTX(2),  
135 consistent with their relative activity in inducing HIV-1 transcriptional blocks. As expected,  
136 UTX depletion also resulted in elevation of cellular H3K27me3 levels.

137 In summary, we were able to demonstrate in three latently infected Jurkat T-cell  
138 lines and in multiple clones derived from two unique shRNAs that UTX depletion  
139 enhances HIV-1 silencing and blocks reactivation of HIV-1 transcription.

#### 140 **Enhanced recruitment of UTX to the HIV-1 LTR during proviral reactivation**

141 UTX activates HIV-1 provirus by converting the LTR chromatin structure to a more  
142 transcriptionally active state by up-regulation of H3K4 methylation and down-regulation  
143 of H3K27 methylation [48]. We confirmed and expanded these observations using  
144 chromatin immunoprecipitation (ChIP) assays [23, 24, 49] to measure the accumulation  
145 of RNAP II, UTX, EZH2 and H3K27me3 at the 5'LTR of reactivated proviruses (**Fig 2**).

146 After stimulation of latent proviruses with 10 ng/ml TNF- $\alpha$  for an hour, we observed  
147 a more than 10-fold increase in RNAP II recruitment to the Nuc-0, promoter, and Nuc-1  
148 regions of HIV-1 5'LTR (**Fig 2A**), indicating the initiation of viral transcription. The increase  
149 in RNAP II was associated with a 2 to 3-fold elevation of UTX (**Fig 2B**). Consistent with  
150 our previous reports documenting EZH2 repression of HIV-1 transcription in T cells [23,  
151 24], proviral reactivation resulted in corresponding reductions in the levels of EZH2 (**Fig**



152 **2C**) and H3K27me3 (**Fig 2D**). CHIP assays were also performed on an E4 clone  
153 expressing shUTX(2) RNA and a control clone expressing the scrambled shRNA.  
154 Depletion of UTX resulted in a reduction of RNAP II occupancy throughout the LTR (**Fig**  
155 **2E**). The expected removal of UTX throughout the HIV-1 provirus was demonstrated as  
156 a control for shRNA potency (**Fig 2F**). Together, our data demonstrates that UTX is  
157 recruited to HIV-1 5'LTR and facilitates the initiation of HIV-1 transcription.

### 158 **The HIV-1 LTR is a bivalent promoter and requires UTX for reactivation**

159 Bivalent promoters, which include the HIV-1 LTR [48], characteristically contain  
160 both activating H3K4me3 and repressive H3K27me3 marks at the same nucleosomes  
161 and are usually maintained at a repressed but inducible transcriptional state [50, 51]. The  
162 important role of UTX demethylase activity for the resolution and activation of genes  
163 containing bivalent promoters has been documented [36, 37].

164 To directly evaluate whether the UTX demethylase activity participates in HIV-1  
165 transcriptional reactivation, we inhibited H3K27me3 using GSK-J4, a specific antagonist  
166 for both UTX and JMJD3 demethylase activity. E4 and 3C9 cells were pretreated for 24  
167 hours with 5 or 10  $\mu$ M of GSK-J4, then further stimulated with 2  $\mu$ M SAHA or 10 ng/ml  
168 TNF $\alpha$  overnight. As shown in **Fig 3A**, a dose-dependent inhibition of HIV-1 reactivation  
169 was observed in both E4 and 3C9 cells when cells were treated with GSK-J4. This was  
170 seen in all tested concentrations of SAHA and TNF $\alpha$ . With 10  $\mu$ M of GSK-J4, a maximal  
171 reduction of more than 50% in the reactivation levels of provirus was obtained in both cell  
172 lines. Representative histograms showing the FACS analysis of HIV-1 reactivation are  
173 shown in **S1 Fig**.

174 ChIP performed on E4 cells measuring the density of RNAP II, H3K4me3, and  
175 H3K27me3 at the 5'LTR of silenced provirus confirms the bivalent nature of the HIV-1  
176 promoter and the ability of GSK-J4 to block proviral reactivation (**Fig 3B to D**). In  
177 untreated cells, RNAP II accumulates near the promoter and Nuc-1 (**Fig 3B**) [49]. Nuc-1  
178 and Nuc-2 are simultaneously occupied by both methylated histones (**Fig 3C & D**) [48].

179 Upon TNF- $\alpha$  stimulation in the absence of GSK-J4, there was enhanced  
180 recruitment of RNAP II to HIV-1 promoter region (-116 to +4 position relative to  
181 transcription start site (TSS)), a direct measure of transcriptional reactivation of HIV-1  
182 [49]. Concomitantly, H3K4me3 levels at the Nuc-1 and Nuc-2 regions were substantially  
183 increased, and as expected, H3K27me3 was completely removed at the same regions  
184 [23, 24]. By contrast, when the provirus was reactivated by TNF- $\alpha$  in the presence of  
185 GSK-J4, the levels of H3K4me3 and H3K27me3 were fully restored, while RNAP II levels  
186 were reduced (**Figs 3B to D**).

187 These observations strongly support the conclusion that the H3K27 demethylase  
188 activity of UTX is essential for the reactivation of the silent provirus' bivalent 5'LTR.

### 189 **Simultaneous demethylation of H3K27me3 and methylation of H3K4 are required** 190 **for HIV-1 reactivation**

191 The bivalency of the HIV-1 5' LTR and the association of UTX with the H3K4  
192 methyltransferase MLL2/MLL3 complex strongly suggested that H3K4me3 is crucial for  
193 HIV-1 reactivation. To test this hypothesis, we ectopically expressed HA-tagged histone  
194 H3.3 containing either a wild type sequence, the single mutants K4M and K27M, or a  
195 double mutant K4M-K27M and investigated their impacts on HIV-1 reactivation. Lysine to  
196 methionine (K to M) mutations of H3.3 have dominant negative effects on the global lysine

197 methylation of histone H3 at different residues [52]. A substantial reduction in the cellular  
198 levels of H3K27me3 or H3K4me2-3 was observed in cells expressing K4M or K27M  
199 mutants of H3.3 (**Fig 4A**). Compared to the wild type, the K27M mutant spontaneously  
200 reactivated HIV-1 and significantly sensitized provirus to reactivation induced by 2  $\mu$ M  
201 SAHA or 10 ng/ml TNF- $\alpha$ . By contrast, the K4M mutant had no significant effect on HIV-  
202 1 reactivation (**Fig 4B**). The double mutant K4M-K27M abolished the enhanced  
203 reactivation induced by the K27M single mutant and restored the phenotype of wild type  
204 H3.3 (**Fig 4B**).

205 We conclude that maintenance of H3K4me3 is required for the reactivation of HIV-  
206 1 transcription mediated by the demethylation of H3K27me3. This strongly indicates that  
207 UTX plays a dual role in HIV-1 reactivation: removal of H3K27me3 and recruitment of  
208 MLL2/3 complexes to deposit H3K4me3.

### 209 **Inhibition of UTX induces DNA methylation of the HIV-1 LTR**

210 DNA methylation is generally a more permanent epigenetic silencing mechanism  
211 than histone methylation alone. Often during development, increases of H3K27  
212 methylation result in a corresponding increase in DNA methylation leading to permanent  
213 gene silencing [53-55]. Since, depletion of UTX caused an increase in global H3K27me3  
214 levels, we next tested whether UTX depletion also induce DNA methylation of HIV-1.

215 The HIV-1 genome carries a series of CpG islands that are subject to DNA  
216 methylation (**Fig 5A**), although the functional role of DNA methylation in HIV-1 latency is  
217 controversial [45, 56-58]. One commonly used approach for measuring the impact of DNA  
218 methylation on gene expression is to use 5'-Azacytidine (5-AZC), an analogue of cytosine  
219 that can be incorporated into DNA during DNA replication, to inhibit DNA

220 methyltransferases (DNMTs). Binding of DNMTs to 5-AZC results in “covalent trapping”  
221 of DNMTs resulting in degradation of the enzymes [59]. An increase in gene expression  
222 by 5-AZC therefore implies removal of a repressive DNA methylation mark. As shown in  
223 **Fig 5B**, E4 cells expressing either scrambled or UTX shRNAs were treated for 72 hours  
224 with 5-AZC (1  $\mu$ M), then left untreated or stimulated further overnight either through the  
225 T-cell receptor (TCR) (using as combination of  $\alpha$ -CD3 (125 ng/ml) and  $\alpha$ -CD28 (500  
226 ng/ml)), treatment with 500 nM of SAHA, or activation with 1 ng/ml of TNF- $\alpha$ . HIV-1  
227 transcription was measured by monitoring d2EGFP expression levels using flow  
228 cytometry. Compared to the scrambled shRNA-treated control cells, we observed greater  
229 elevations of HIV-1 expression in the shUTX knock down cells. When treated with 5-AZC,  
230 cells expressing scrambled shRNA showed a less than a 1.5-fold increase in HIV-1  
231 expression while the UTX shRNA treated cells resulted showed a 3 to 6-fold increase.  
232 Reactivation of the proviruses following treatment of 5-AZC pretreated cells through the  
233 TCR, SAHA, or TNF- $\alpha$  each enhanced reactivation of HIV-1 in shUTX knock down cells  
234 compared to the control cells.

235 In a complementary approach, we directly measured the levels of 5’-  
236 methylcytosine at the HIV-1 provirus in a E4 clone expressing UTX-1 shRNA by MeDIP  
237 coupled to qPCR. The primers used for qPCR (**Fig 5A**) were designed to specifically  
238 amplify the 5’ CpG, NCR CpG and Env CpG islands [60]. However, the Nuc-2 primers  
239 used in this study only covered the downstream region of NCR CpG cluster. Compared  
240 to HIV-1 from control cells, HIV-1 from the shUTX knock down cells contained much  
241 higher levels of 5’-methylcytosine. Similarly, HIV-1 from E4 cells treated with GSK-J4 also

242 contained higher levels of DNA methylation at the 5' CpG and Nuc-2 clusters than HIV-1  
243 proviruses from untreated cells (**Fig 5C**).

244 Taken together, our data demonstrate that either the depletion of UTX by shRNA  
245 or inhibition of its demethylase activity by GSK-J4 greatly increased the DNA methylation  
246 of HIV-1 proviruses.

#### 247 **DNMT3A is recruited to the HIV-1 LTR after inhibition of UTX by GSK-J4**

248 To further study the interplay between UTX and DNA methylation, we ectopically  
249 expressed the transgene DNMT3A-3xFlag. In this construct, 3xFlag was introduced at  
250 the C-terminal of DNMT3A which allowed us to perform ChIP assays using the Flag M2  
251 antibody to measure the enrichment of DNMT3A at HIV-1 5'LTR. E4 cells transduced with  
252 *Dnmt3a*-3xFlag lentiviruses expressed greatly increased levels of DNMT3A (**Fig 5D**).  
253 ChIP assays showed that treatment of these cells with 10  $\mu$ M GSK-J4 for 48 hours  
254 resulted in significant recruitment of DNMT3A to HIV-1 5' CpG and Nuc2 clusters (**Fig**  
255 **5D**), but not to the promoters of two control genes, TNFA and GAPDH. Finally, as a  
256 complementary approach we also knocked out the DNA demethylases TET1 or TET2  
257 using CRISPR-Cas9. Knock out of either gene partially inhibited HIV-1 reactivation in  
258 Jurkat cells after reactivation with SAHA or TNF- $\alpha$  (**Fig 5E**). In conclusion, inhibition of  
259 UTX results in specific recruitment of DNMT3A to HIV-1, which in turn elevates DNA  
260 methylation of the HIV-1 provirus and enhances HIV-1 silencing.

#### 261 **Inhibition of UTX accelerates silencing of HIV-1 in primary cell models of HIV-1** 262 **latency**

263 Epigenetic silencing in primary cells involves additional important mechanisms that  
264 are not well represented in the transformed Jurkat cell background. Specifically, we

265 showed previously that both the EZH2 and EHMT2 histone methyltransferases strongly  
266 restrict HIV-1 transcription in primary T-cell models for HIV-1 latency and in resting  
267 memory T-cells isolated from HIV-1 infected patients. However, EZH2 is the dominant  
268 histone methyltransferase in Jurkat T-cells and EHMT2 makes only a small contribution  
269 to silencing [23]. We therefore extended our study of the role of the H3K27 demethylase  
270 activity of UTX on HIV-1 silencing and reactivation using the well-established QUECEL  
271 (Th17 cells) primary cell model of HIV latency [22, 61] (**Fig 6**).

272 As outlined in **Fig 6A**, naïve CD4<sup>+</sup> T cells obtained from 4 different donors were  
273 polarized to a Th17 phenotype and then infected with a single round HIV-1 reporter  
274 expressing d2EGFP, following the QUECEL protocol [22]. Three days after HIV-1  
275 infection (Day 0), the cells were grown in the presence of 1  $\mu$ M of GSK-J4 for 4 days, with  
276 fresh media containing the drug added after 2 days. On average, the addition of GSK-J4  
277 increased global levels of H3K27me3 more than two fold from 4 different donors (**Fig 6B**).

278 At Day 0, the infected cells were transferred to media containing low  
279 concentrations of IL-2 (15 IU/ml), and IL-23 (12.5  $\mu$ g/ml). The levels of d2EGFP  
280 expression were measured by flow cytometry at days 4, 6, or 8 to monitor HIV silencing.  
281 In the presence of these low concentrations of cytokines, cells gradually enter quiescence  
282 leading to silencing of HIV-1 transcription (**Fig 6C**). The extent of HIV silencing is  
283 significantly enhanced by GSK-J4. At Day 4, the average d2EGFP expression from 4  
284 donors was 46.5% relative to day 0 (ranging from 35.5% to 54.6%) while the average  
285 d2EGFP expression from the untreated cells was 59% (ranging from 41.6% to 68.3%).  
286 The differences in the average d2EGFP expression between cells treated with GSK-J4  
287 and untreated cells were progressively increased by Day 6 (34.5% vs 54.2%) and Day 8

288 (26.2% vs 47.9%) (**Fig 6C**). To confirm that the populations of GFP-negative cells were  
289 latently infected, the cell populations at Day 8 were reactivated using a combination of  
290 SAHA (1  $\mu$ M) and IL15 (10 ng/ml), which is a potent reactivation condition for primary  
291 cells, [22] (**Fig 6C**).

292 HIV-1 DNA methylation was also measured by MeDIP at Day 4. Prior to treatment  
293 with GSK-J4, 5'-methycytosine was not detected at the 5' CpG and NCR CpG clusters in  
294 each of the 4 different donors, suggesting that there was no DNA methylation of HIV-1 at  
295 these regions under these conditions. Substantial increases in the levels of DNA  
296 methylation at these CpG clusters were detected after treatment with 1  $\mu$ M GSK-J4 (**Fig**  
297 **6D**). Increasing in DNA methylation of HIV-1 was statistically more significant at the 5'  
298 CpG region, the region upstream of HIV-1 TSS which also overlaps with a wide variety of  
299 transcription factors binding sites.

300 Since UTX is necessary for the reactivation of latent HIV-1 in Jurkat T cells, its role  
301 in the reactivation of latent HIV-1 in primary Th17 cells was also investigated by  
302 pretreatment of the cells with increasing concentrations of GSK-J4 for 48 hours prior to  
303 reactivation. Treatment of the control cells with Dynabeads reactivated more than 50% of  
304 latent viruses (from 21% to 77% d2EGFP). However, only 17% and 4% of latent viruses  
305 were reactivated in cells treated with 2  $\mu$ M and 4  $\mu$ M of GSK-J4, respectively. Similar  
306 results were also obtained when cells were treated with a combination of SAHA and IL-  
307 15. Quantification of data from 3 different experiments on the same donor also showed a  
308 similar result; GSK-J4 significantly inhibited the reactivation of latent HIV-1 in Th17  
309 primary cells (**Fig 6E**). In conclusion, UTX diminishes the entry of HIV-1 into latency and  
310 is required for the reactivation of latent HIV-1 in primary Th17 cells.

311 **GSK-J4 suppresses HIV-1 reactivation in CD4+ memory T cells isolated from HIV-1**  
312 **infected donors**

313 To investigate the impact of GSK-J4 on reactivation of latent HIV-1 in CD4+  
314 memory T cells obtained from patients, we obtained blood samples from 5 well-  
315 suppressed HIV-1 donors and frozen PBMCs from 1 donor who underwent leukapheresis.  
316 The purified memory cells were treated with 5  $\mu$ M GSK-J4 for 3 days (**Fig 7A**). The cells  
317 were then treated with Dynabeads® Human T-Activator CD3/CD28 over night to  
318 reactivate latent HIV-1. We measured HIV-1 reactivation by EDITS assays [61] (**Fig 7B**).  
319 GSK-J4 significantly inhibited the reactivation of latent HIV-1 in CD4+ memory T cells,  
320 with only about 30% of reactivation observed compared to untreated cells. As a control,  
321 the expression levels of CD69, measured by FACS as an indicator for global T cell  
322 activation, were uniformly greater than 80%, as expected (**Fig 7C**). This data also  
323 demonstrated that the inhibition of latency reversal by GSK-J4 was specific, since  
324 bystander cells treated with GSK-J4 expressed comparable levels of CD69 compared to  
325 the untreated cells after TCR stimulation (**Fig 7C**). There was also a small but statistically  
326 significant increase in H3K27me3 expression in the treated cells, and a correlation  
327 between variations in the inhibition levels of GSK-J4 on HIV-1 reactivation and  
328 H3K27me3 levels between the different donors (**Fig 7D**). Differences in the reactivation  
329 levels of untreated and GSK-J4 treated latent viruses were not due to toxicity of the  
330 compound because there was no significant decrease in cell viabilities (**Fig 7E**).  
331 Therefore, similar to the primary T cell model, reactivation of latent HIV-1 in CD4+  
332 memory T cells from HIV-1 infected donors was also blocked by GSK-J4.



333 **GSK-J4 induces transient HIV-1 DNA hypermethylation in CD4+ memory T cells**  
334 **isolated from HIV-1 infected donors**

335 The ability of GSK-J4 to induce DNA methylation of latent HIV-1 was investigated  
336 in CD4+ memory T cells. Because of the low frequency of latently infected cells in the  
337 patient samples, HIV-1 DNA methylation was measured by targeted next-generation  
338 bisulfite sequencing on proviral DNA isolated from the same donors used in the latency  
339 reversal experiments.

340 The 5'LTR CpG contains nine different CpG dinucleotides. Their positions relative  
341 to HIV-1 transcription start site are shown in **Fig 8A**. Due to limitations in the amount of  
342 HIV-1 DNA, we only investigated DNA methylation of the 5'LTR CpG cluster, which is the  
343 most relevant to transcriptional control of HIV-1 [62]. As shown in **Fig 8B**, GSK-J4  
344 increased average HIV-1 DNA methylation (CpG 1 to 9) for all tested donors and CpG1-  
345 specific methylation for 5 out of 6 donors. Untreated donors showed barely detectable  
346 levels of DNA methylation of latent HIV-1 (mean of the average levels was 0.7%),  
347 consistent with the paucity of HIV-1 DNA methylation at the same region reported from  
348 many studies [62-65]. Upon GSK-J4 treatment, a 1.3 to 10-fold (average of 3-fold)  
349 increase in the average DNA methylation was observed from all tested donors. This is  
350 inversely correlated with inhibitions of HIV-1 reactivation measured by EDITS assays in  
351 the same donor (**Fig 7B & 8B**). Interestingly, out of the nine CpG islands analyzed, we  
352 consistently detected the highest increase of methylation at CpG-1 in 5 out of 6 donors  
353 (**Fig 8C**), while changes of methylation at the other CpG islands were very modest. An  
354 average of 4-fold increase in the DNA methylation levels was observed at CpG-1.

355           We next investigated whether DNA methylation at 5'LTR of HIV-1 induced by GSK-  
356 J4 could be maintained after GSK-J4 withdrawal. CD4+ memory T cells from a different  
357 batch of three HIV-1 infected donors were treated with 5  $\mu$ M of GSK-J4. After 72 hours,  
358 a portion of cells was collected for next-generation bisulfite sequencing. Media containing  
359 GSK-J4 from the remaining cells was washed away and cells were cultured for additional  
360 72 hours in media without GSK-J4. The DNA methylation levels at 5'LTR of HIV-1 from  
361 three different donors before and after GSK-J4 removal were presented in **Fig 8C**. Similar  
362 to what we showed previously, DNA methylation at 5'LTR of HIV-1 was significantly  
363 increased with an average of 4 fold by GSK-J4 treatment. After GSK-J4 removal, DNA  
364 methylation levels at HIV-1 5'LTR were restored back to the initial very levels seen in  
365 untreated cells.

## 366 **Discussion**

### 367 **UTX is required for HIV-1 reactivation**

368 UTX is a specific H3K27 demethylase, associated with the MLL2 and MLL3  
369 containing complexes [66], which are responsible for H3K4 methylation. The combined  
370 reduction of H3K27me3 levels and increase in H3K4me3 levels provides a key step in the  
371 transcription activation of bivalent promoters. Our earlier studies clearly demonstrated  
372 that EZH2, the enzymatic subunit of the PCR2 complex, is required for H3K27me3  
373 formation and is an essential silencing factor for HIV-1 transcription [23]. We reasoned  
374 that blocking UTX might enhance H3K27me3 accumulation at HIV-1 genome and block  
375 proviral reactivation. Consistent with this hypothesis, Zhang et. al [48] showed that UTX  
376 was an activator for the transcription of HIV-1 LTR-driven luciferase in TZM-bl cell, a HeLa  
377 cell line harboring an integrated copy of LTR-luciferase [67].

378 Using a wide variety of approaches to block UTX function in multiple HIV-1 latently  
379 infected Jurkat T-cell lines, primary cells and latently infected cells obtained from patients,  
380 we demonstrate here that UTX is an essential activator for latent HIV-1 reactivation.  
381 Depletion of UTX by shRNA (**Fig 1**) or inhibition of its activity by GSK-J4 prevents the  
382 transcription of latent provirus both in Jurkat T cells (**Fig 3A**) and resting CD4<sup>+</sup> T cells  
383 cultured *ex vivo* (**Fig 6E**).

384 Importantly, pharmacological inhibition of UTX enzymatic activity by GSK-J4  
385 performed on CD4<sup>+</sup> memory T cells isolated from well-suppressed HIV-1 infected donors  
386 significantly reduces the induction of HIV-1 reactivation by TCR stimulation (**Fig 7B**).  
387 GSK-J4 also accelerates the silencing of provirus in primary Th17 cells (**Fig 6A to C**).

388 Finally, the inhibition of HIV-1 reactivation by GSK-J4 or UTX depletion by shRNA  
389 is observed in cells infected with wild type, H13L Tat, or Nef-deleted mutants of HIV-1  
390 (**Fig 1**). This suggests that UTX activation of HIV-1 transcription is due to epigenetic  
391 transcriptional activation of the HIV LTR and is independent of Nef or Tat function.

### 392 **UTX is required to resolve the bivalent chromatin at the 5'LTR of latent HIV-1** 393 **proviruses**

394 Genome-wide chromatin immunoprecipitation studies have described bivalent  
395 genes, in which co-occurrence of H3K27me<sub>3</sub>, a repressive mark, and H3K4me<sub>3</sub>, an  
396 activating mark, is detected within a nucleosome [68, 69]. Bivalent genes are therefore  
397 maintained in a poised or reversibly silent state that could be promptly and forcefully  
398 activated with an appropriate signal [50]. However, the stimulus signal threshold required  
399 for full activation of bivalent genes is thought to be higher than other genes [50].

400 The 5' LTR of latent HIV-1 in T cells closely resembles cellular bivalent genes [50]  
401 and is characterized by the presence of H3K4me<sub>3</sub> and H3K27me<sub>3</sub> (**Figs 3B to 3D**),  
402 restricted transcription by PRC2 [23], and high enrichment of CpG dinucleotides [70] but  
403 low methylation of DNA regions surrounding the transcription start site (**Figs 5C & 8B**)  
404 [71, 72]. Bivalency is also consistent with robust reactivation of HIV and the extensive  
405 limitation of viral transcription elongation (**Figs 2 & 3**) [21, 23, 24, 49, 61].

406 UTX recruitment to the HIV-1 LTR is enhanced when latent HIV-1 is reactivated by  
407 TNF $\alpha$  (**Fig 2**). This alters the balance between H3K27me<sub>3</sub> and H3K4me<sub>3</sub> at the LTR after  
408 reactivation (**Figs 3B to 3D**). Inhibition of UTX by GSK-J4 blocks the H3K27me<sub>3</sub>  
409 reduction and H3K4me<sub>3</sub> increases at the HIV-1 LTR (**Figs 3B to 3D**), which correlates  
410 with the inhibition of HIV-1 reactivation in Jurkat T cell (**Fig 3A**).

411           The functional significance of H3K27me3 and H3K4me3 is confirmed using ectopic  
412 expression of H3.3 variants carrying mutations at K27 and K4. These experiments shows  
413 that HIV-1 reactivation mediated by H3.3 K27M is inhibited by H3.3 K4M, consistent with  
414 the bivalency of its 5'LTR. The bivalency of the HIV promoter may also explain why  
415 permanent suppression of the provirus is difficult to achieve.

416           This entire process is orchestrated by UTX, which combines its intrinsic H3K27  
417 demethylase activity and its association with the MLL2/MLL3 complexes. The  
418 requirement for UTX to induce transcription of cellular bivalent genes has been well  
419 documented [36, 37], and is similar to HIV-1, as reported in this study. We hypothesize  
420 that the changes in chromatin modifications at 5'LTR of latent HIV-1 are biphasic.  
421 H3K27me3 removal occurs in the first phase and is required for a second phase of  
422 H3K4me3 accumulation. These conclusions are further strengthened by the observation  
423 that H3.3 K4M inhibits H3.3 K27M mediated HIV-1 reactivation (**Fig 4**). Therefore, our  
424 ectopic expression experiments suggest that both H3K27me3 displacement and  
425 H3K4me3 deposition on the same nucleosome, and possibly on the same histone H3  
426 subunits, are required for efficient reactivation of latent HIV-1.

#### 427 **Transient DNA methylation of latent HIV-1 is induced by inhibition of UTX**

428           The interplay between H3K27me3 and DNA methylation has not been fully  
429 elucidated. Genome-wide studies mapping overlapping sites of H3K27me3 by ChIP-seq  
430 and methylated CpG microarray data reveal a mutually exclusive relationship between  
431 these two marks at CpG promoters [73-75]. However, some studies report the correlation  
432 of H3K27me3 and DNA methylation at the promoters of a subset of genes [71, 73]. More  
433 recently, by bisulfite sequencing of chromatin immunoprecipitated DNA, Statham et al.

434 has reported that H3K27me3 can co-occur with either unmethylated or methylated DNA  
435 [76]. In addition, DNA hypomethylation resulted from induced H3K27me3 reduction is  
436 observed at promoters of many genes in K27M mutant pediatric high-grade gliomas [53].  
437 These findings indicate that change in the level of H3K27me3 at specific gene promoters  
438 affects promoter DNA methylation.

439         Using biochemical and MeDIP assays, we demonstrate that depletion of UTX  
440 expression by shRNAs or pharmacological inhibition of its H3K27 demethylase by GSK-  
441 J4 results in increased DNA methylation of latent HIV-1 in Jurkat T cells. DNA methylation  
442 occurs at the 5' CpG and NCR CpG clusters, surrounding the HIV-1 TSS (**Fig 5**). Similar  
443 DNA methylation patterns were seen in Th17 primary cells after treatment with GSK-J4  
444 (**Fig 6D**). In addition, targeted next-generation bisulfite sequencing assays performed on  
445 CD4+ memory T cells isolated from well-suppressed HIV-1 infected donors also  
446 demonstrate a significant induction of DNA methylation at the 5'LTR CpG cluster when  
447 proviruses are treated with GSK-J4 (**Figs 8B & C**). The extent of DNA methylation at the  
448 HIV 5'LTR under these conditions in our study was comparable to those acquired from  
449 specific recruitment of a chimeric zinc finger DNMT1 to HIV-1 5'LTR performed in Jurkat  
450 T cells [77].

451         Previous reports have indicated a link between H3K27me3 and DNA methylation  
452 pathways [71, 73]. Bender et al. described that reduced H3K27me3 in K27M mutant  
453 pediatric high-grade gliomas results in DNA hypomethylation in many genes [53]. An  
454 earlier study demonstrated the correlation between DNA hypermethylation and loss of  
455 bivalent chromatin [78]. Though the precise molecular mechanisms involved have yet to  
456 be clarified, it is likely that H3K27me3 retention and H3K4me3 loss at HIV-1 5'LTR caused

457 by UTX depletion or GSK-J4 (**Figs 3B to 3D**) mediates the recruitment of DNA  
458 methyltransferases, including DNMT3A, to HIV-1 (**Fig 5E & F**). This hypothesis is  
459 supported by several studies showing that elevation of H3K27me3 or retention of  
460 H3K27me3 and loss of H3K4me3 is correlated with DNA hypermethylation [53, 76, 78].  
461 Recruitment of de novo DNA methyltransferase DNMT3A to the 5'LTR CpG upon  
462 inhibition of UTX/JMJD3 by GSK-J4 likely results in induction of DNA methylation at that  
463 region; however, the involvement of DNMT1 in this process could not be refuted.

464 We consistently observed that the largest increase of methylation at the HIV 5'LTR  
465 occurs at CpG-1, a region that does not overlap with the majority of transcription factor  
466 binding sites. We hypothesize that methylation at this CpG-1 indirectly prevents the  
467 recruitment of transcription activators to the nearby locations by mediating recruitment of  
468 DNMTs. However, further elucidation is still required to reveal how methylation at this  
469 CpG dinucleotide negates HIV-1 transcription.

#### 470 **Implications for the “block and lock strategy” for a functional HIV cure**

471 The inhibitory effect of GSK-J4 on latent HIV-1 reactivation in Jurkat T cells (**Fig**  
472 **3A**), Th17 primary T cells (**Fig 6E**), and CD4+ memory T cells from HIV-1 infected donors  
473 (**Fig 7B**), demonstrates its potential as an agent for blocking HIV-1 rebound in infected  
474 patients. In addition to its inhibition of UTX, the ability of GSK-J4 to induce 5'LTR DNA  
475 methylation of latent HIV-1, although only temporary, is intriguing as it relates to “block  
476 and lock” studies of the irreversible silencing of latent HIV-1.

477 Among gene silencing mechanisms, DNA methylation at promoters has been  
478 suggested as a mechanism for the stable suppression of gene expression. DNA  
479 methylation at promoters is involved in imprinted X inactivation [79], and in suppression

480 of human endogenous retroviruses (HERVs) [80]. Unlike the heavy DNA methylation at  
481 the LTR of HERVs (more than 30% [81]), DNA methylation at 5'LTR CpG cluster of latent  
482 HIV-1 is scarcely detected in this study (the average observed DNA methylation is less  
483 than 1% - **Fig 8B**) and other studies [62-65], indicating that latent HIV-1 is actually  
484 maintained in a poised state rather than a stably repressed state like imprinted genes on  
485 inactive X chromosome or HERVs. It is unclear what determines the differences of DNA  
486 methylation observed between latent HIV-1 and HERVs. Possession of a defective  
487 genome cannot account for this variance given that only 45% of latent HIV-1 clones from  
488 patients have large deletions [65].

489 We hypothesize that DNA methylation at the HIV LTR is highly dynamic. Since  
490 knock out of the DNA demethylases TET1 or TET2 only partially inhibited HIV-1  
491 reactivation in Jurkat cells (**Fig 5E**), it seems likely that the involvement of multiple TET  
492 proteins lead to rapid HIV-1 demethylation. Similarly, it is notable that GSK-J4 only  
493 temporarily promotes DNA methylation at 5'LTR of HIV-1 by recruitment of DNMT3A. A  
494 rapid turnover of DNA methylation at the HIV LTR could therefore explain the extremely  
495 low levels of DNA methylation measured at 5' LTR of latent HIV-1 in comparison to those  
496 detected at imprinted X genes or HERVs.

497 Our study is the first one to report that DNA methylation of latent HIV-1 can be  
498 induced by a small molecule inhibitor like GSK-J4. It is a measure of the great potency of  
499 these epigenetic restrictions that under these conditions, latency reversal due to TCR  
500 activation was blocked by over 70% in patient cells, with some donors showing nearly  
501 complete blocks to reactivation. Nonetheless, these powerful epigenetic blocks did not  
502 lead to long-term epigenetic silencing. We are therefore skeptical that the long-term HIV



503 silencing following treatment of cells by didehydro-cortistatin A is primarily due to  
504 epigenetic silencing [17-20]. Alternative mechanisms could include the selective loss of  
505 cells carrying proviruses during dCA exposure or reactivation, or long-term inhibition of a  
506 cellular cofactor required for transcription, such as the mediator complex. These and other  
507 possibilities need to be evaluated as potential explanations for these provocative  
508 observations.

509         In summary, our study documents the essential role of UTX as an activator for HIV-  
510 1 transcription as well as a mediator for maintaining the bivalent chromatin at the 5' LTR  
511 of latent HIV-1 proviruses. We have identified GSK-J4, a H3K27 demethylase inhibitor,  
512 as a potential agent for blocking latent HIV-1 reactivation in T cells. Unexpectedly, GSK-  
513 J4 has been shown to be able to induce DNA methylation of latent HIV-1, but  
514 unfortunately, the induction of DNA methylation by GSK-J4 on HIV-1 was only maintained  
515 in the presence of GSK-J4 and could not persist after GSK-J4 removal. Methods to further  
516 enhance DNA methylation at the HIV LTR should be further explored as part of a “block  
517 and lock” strategy. These could include targeted recruitment of DNMTs to HIV-1 [77, 82,  
518 83], and induction of DNA methylation by piRNA production [84]. However, since DNA  
519 methylation by DNMT3A and DNA demethylation by TET1 and TET2 are highly dynamic,  
520 it presents a formidable barrier to achieving the permanent epigenetic silencing of HIV  
521 proviruses.

## 522 **Materials and Methods**

### 523 **Cell lines and cell culture reagents**

524 E4, 2D10, and 3C9 latently HIV-1 infected Jurkat T cell lines were used [24]. E4  
525 and 2D10 cells were infected with Nef deleted HIV-1, while 3C9 cell line contained Nef +  
526 HIV-1. Cells were cultured in HyClone RPMI medium with L-glutamine, 5% fetal bovine  
527 serum (FBS), penicillin (100 IU/ml), streptomycin (100 µg/ml) in 5% CO<sub>2</sub> at 37°C. Primary  
528 T cells were cultured in RPMI medium supplemented with 10% FBS, 1 mg/ml normocin  
529 (Invivogen, ant-nr), and 25 mM HEPES pH 7.2.

### 530 **VSV-G pseudotyped HIV-1 virus production**

531 VSV-G pseudotyped HIV-1 was produced as previously described using the  
532 Thy1.2-d2EGFP-Nef-pHR' vector (which expresses Thy1.2, Nef, and d2EGFP), as well  
533 as the pdR8.91 and VSV-G vectors [24]. Cells were infected with HIV-1 by spinoculating  
534 with viruses at 3480 rpm for 1.5 hrs at room temperature.

### 535 **UTX shRNA, TET1/TET2 CRISPR-Cas9, H3.3 mutant, and Dnmt3a-3xFlag** 536 **constructs**

537 Two sequences of UTX shRNAs were used: UTX-  
538 1(TGGAACAGCTCCGCGCAAATA) and UTX-2(TGCACTTGCAGCACGAATTAA).  
539 shRNAs were cloned into pLVTHM plasmid which was a gift from Didier Trono (Addgene  
540 plasmid # 12247). We replaced GFP from pLVTHM with mCherry for selection. HA tagged  
541 H3.3 wild type (wt) and K27M lentiviral vectors were received from the previous study  
542 [52]. H3.3 K4M and K4M-K27M mutants were made by site-directed mutagenesis from  
543 the H3.3 wt and K27M constructs. Dnmt3a-3xFlag lentiviral construct was ordered from  
544 VectorBuilder (vector ID: VB180918-1067xya). Guide RNAs targeting TET1

545 (GCATGGAAGAGTCCTCTCTC and AAAGGCCTGTCCTAGGAAAG) or TET2  
546 (TTCTGGGTGTAAGCTTGCCT and GGTTGATACTGAAGAATTGA) were cloned into  
547 the lentiCRISPR v2 (Addgene #52961). Lentiviral production and transduction of cells  
548 with viruses were described previously [23]

#### 549 **Western blot**

550 The following antibodies were used for Western blot: UTX (A302-374A, Bethyl),  $\beta$ -  
551 actin (sc-47778, Santa-Cruz), Histone H3 (ab1791, Abcam), Histone H3K27me3  
552 (ab6002, Abcam), Histone H3K4me3 (ab8580, Abcam), Histone H3K4me2 (ab1220,  
553 Abcam), HA tag (sc805, Santa-Cruz), Flag M2 (F1804, Sigma), and  $\alpha$ -tubulin (ab4074,  
554 Abcam). Western blot was performed as described previously [24]. Fifty  $\mu$ g of total cell  
555 lysate per lane was loaded.

#### 556 **ChIP-qPCR analysis**

557 Chromatin immunoprecipitation (ChIP) was performed as previously described  
558 using the Pierce Agarose ChIP Kit (Thermo Scientific) [23, 24]. The following antibodies  
559 were used for ChIP: RNAP II (17-672, Millipore) or (sc-899, Santa Cruz), EZH2 (17-662,  
560 Millipore), Histone H3 (ab1791, Abcam), Histone H3K4me3 (ab8580, Abcam), Histone  
561 H3K27me3 (ab6002, Abcam), and UTX antibody (A302-374A, Bethyl). The Flag M2  
562 magnetic beads (M8823, Sigma) were used to immunoprecipitate DNMT3A-3xFlag in (Fig  
563 6) following the same protocol for ChIP. The percentage of input method was used to  
564 calculate the enrichment of proteins at specific regions of HIV-1 genome. Primers were  
565 used for amplification of GAPDH and TNF $\alpha$  promoters: TNF-F:  
566 CCCCTCGGAATCGGA, TNF-R: GAGTCATCTGGAGGAAGCG, GAPDH-F:  
567 CGGTGCGTGCCCAGTT, GAPDH-R: CCCTACTTTCTCCCCGCTTT.

## 568 **Methylated DNA immunoprecipitation (MeDIP)**

569 DNA was isolated by Qiagen DNeasy kit, then sonicated for 20 minutes (30 second  
570 ON/30 second OFF) to generate fragments with the size of 500 bp. Two  $\mu\text{g}$  of DNA was  
571 heat-denatured for 10 minutes at 95°C to produce single-stranded DNA. Two  $\mu\text{g}$  of  
572 antibody against 5-methyl cytosine (ab10805, Abcam) was used to immunoprecipitate  
573 methylated DNA fragment for overnight. Bound DNA was washed thoroughly and eluted  
574 for quantitative measurement by qPCR. The following primers were used for qPCR:  
575 5'LTRCpG-F: GAAGTGTTAGAGTGGAGGTTTGA, 5'LTRCpG-R:  
576 CAGCGGAAAGTCCCTTG TAG, EnvCpG-F: TTTGTTCCCTTGGGTTCTTGG, EnvCpG-R:  
577 TGGTGCAAATGAGTTTTCCA.

## 578 **Production of HIV-1 latently infected primary cells and virus reactivation**

579 HIV-1 latently infected Th17 primary cells (QUECEL) were produced following  
580 previously described procedure [61] and using Thy1.2-d2EGFP-Nef-pHR' construct.  
581 Reactivation of proviruses was performed by incubating cells overnight with Dynabeads®  
582 Human T-Activator CD3/CD28 (25  $\mu\text{l}$ /10<sup>6</sup> cells) or a combination of SAHA (1  $\mu\text{M}$ ) and IL15  
583 (10 ng/ml).

## 584 **Treatment of E4 cell line with 5'-Azacytidine (5-AZC)**

585 5-AZC was purchased from Sigma (A2385) and dissolved in 50% acetic acid. Cells  
586 were pretreated with 1  $\mu\text{M}$  5-AZC for 72 hours then left untreated or treated further with  
587 a combination of anti-CD3 (125 ng/ml) and anti-CD28 (500 ng/ml), 500 nM of SAHA, or 1  
588 ng/ml of TNF $\alpha$  overnight. HIV-1 reactivation in the cells was measured by FACS. Fold of  
589 HIV-1 reactivation was calculated by normalizing the levels of d2EGFP expression after  
590 drugs treatment to those obtained from the 5-AZC untreated conditions.

## 591 **Treatment of HIV-1 latently infected Jurkat cells and primary cells with inhibitors**

592 GSK-J4 was purchased from Selleckchem (S7070) and dissolved in DMSO. Cells  
593 were treated with increasing concentrations of GSK-J4. Cell viability was measured by  
594 propidium iodide (5 µg/ml, 10008351-Cayman) or calcein AM viability dye (65-0854-39-  
595 eBioscience) staining.

## 596 **RNA induction assay (EDITS assay)**

597 CD4<sup>+</sup> memory T cells isolated from HIV-1 infected donors were treated with GSK-  
598 J4 for 3 days. Then cells were stimulated overnight with Dynabeads® Human T-Activator  
599 CD3/CD28, followed by staining with anti-CD69 (1:100 dilution, 557745 –BD Pharmingen)  
600 and FACS analysis. EDITS assays to measure the reactivation of latent HIV-1 in CD4<sup>+</sup>  
601 memory T cells isolated from well suppressed HIV-1 infected donors were performed as  
602 described previously [61].

## 603 **Targeted next-generation bisulfite sequencing**

604 PBMCs were purified from fresh blood samples, which were collected following the  
605 guidelines from an approved IRB protocol, using Ficoll-Paque. CD4<sup>+</sup> memory T cells were  
606 isolated by human memory CD4 T cell enrichment kit (19157, Stemcell). Cells were  
607 cultured as a million cells per ml in RPMI media supplemented with 10% FBS and 15  
608 units/ml of IL2. Cells were treated with 0 or 5 µM of GSK-J4 for 72 hours. Total genomic  
609 DNA was isolated using DNeasy Blood & Tissue Kit (69504, Qiagen). Bisulfite conversion  
610 of DNA was performed by EZ DNA methylation-lightning kit (D5030, Zymo research)  
611 using 1.5 µg of DNA per reaction. Nested PCR to amplify the 5' LTR CpG cluster of  
612 HIV-1 was performed as described previously [56] using 125 ng of bisulfite-treated DNA  
613 per reaction. Ion torrent A and P1 sequencing adapters and barcode sequences were

614 incorporated to the primers used for the second round of PCR by oligo synthesis. The  
615 amplified PCR products were gel purified and loaded on the ion 540 or 520 Chip for next-  
616 generation sequencing using the Ion Chef and Ion S5 sequencing system (ThermoFisher)  
617 following manufacturer's protocol. CpG methylation was analyzed by QUMA with the  
618 default settings [85] using the 5'LTR sequence from the HBX2 strain as reference.  
619

## 620 **Acknowledgment**

621           We thank Robert Assad and Miguel E. Quiñones-Mateu for providing us blood  
622 samples from HIV-1 infected donors. We also thank former and present members of the  
623 Karn laboratory and Nga Le for help and useful discussion. This work was supported by  
624 US Public Health Service grants R01 MH110360, R01 DA043159, R01 AI148083 and  
625 amfAR grant 109347-59-RGRL to JK. We also thank the CWRU/UH Center for AIDS  
626 Research (P30-AI036219) for provision of flow cytometry services.

627

## 628 **References**

- 629 1. Davey RT, Jr., Bhat N, Yoder C, Chun TW, Metcalf JA, Dewar R, et al. HIV-1 and  
630 T cell dynamics after interruption of highly active antiretroviral therapy (HAART) in  
631 patients with a history of sustained viral suppression. *Proc Natl Acad Sci U S A.*  
632 1999;96(26):15109-14. PubMed PMID: 10611346; PubMed Central PMCID:  
633 PMCPMC24781.
- 634 2. Zhang L, Chung C, Hu BS, He T, Guo Y, Kim AJ, et al. Genetic characterization of  
635 rebounding HIV-1 after cessation of highly active antiretroviral therapy. *J Clin Invest.*  
636 2000;106(7):839-45. doi: 10.1172/JCI10565. PubMed PMID: 11018071; PubMed Central  
637 PMCID: PMCPMC517816.
- 638 3. Kim Y, Anderson JL, Lewin SR. Getting the "Kill" into "Shock and Kill": Strategies  
639 to Eliminate Latent HIV. *Cell Host Microbe.* 2018;23(1):14-26. doi:  
640 10.1016/j.chom.2017.12.004. PubMed PMID: 29324227.
- 641 4. Yeh YJ, Ho YC. Shock-and-kill versus block-and-lock: Targeting the fluctuating  
642 and heterogeneous HIV-1 gene expression. *Proc Natl Acad Sci U S A.* 2021;118(16).  
643 Epub 2021/03/25. doi: 10.1073/pnas.2103692118. PubMed PMID: 33758027.
- 644 5. Li JZ, Gandhi RT. The Search for an HIV Cure: Where Do We Go From Here? *J*  
645 *Infect Dis.* 2021;223(Supplement\_1):1-3. Epub 2021/02/16. doi: 10.1093/infdis/jiaa738.  
646 PubMed PMID: 33586774; PubMed Central PMCID: PMCPMC7883020.
- 647 6. Siliciano JD, Siliciano RF. Low Inducibility of Latent Human Immunodeficiency  
648 Virus Type 1 Proviruses as a Major Barrier to Cure. *J Infect Dis.*



649 2021;223(Supplement\_1):13-21. Epub 2021/02/16. doi: 10.1093/infdis/jiaa649. PubMed  
650 PMID: 33586775; PubMed Central PMCID: PMCPMC7883034.

651 7. Pache L, Marsden MD, Teriete P, Portillo AJ, Heimann D, Kim JT, et al.  
652 Pharmacological Activation of Non-canonical NF- $\kappa$ B Signaling Activates Latent HIV-1  
653 Reservoirs In Vivo. *Cell Rep Med.* 2020;1(3):100037. Epub 2020/11/19. doi:  
654 10.1016/j.xcrm.2020.100037. PubMed PMID: 33205060; PubMed Central PMCID:  
655 PMCPMC7659604.

656 8. Ait-Ammar A, Kula A, Darcis G, Verdikt R, De Wit S, Gautier V, et al. Current Status  
657 of Latency Reversing Agents Facing the Heterogeneity of HIV-1 Cellular and Tissue  
658 Reservoirs. *Front Microbiol.* 2019;10:3060. Epub 2020/02/11. doi:  
659 10.3389/fmicb.2019.03060. PubMed PMID: 32038533; PubMed Central PMCID:  
660 PMCPMC6993040.

661 9. Lichterfeld M. Reactivation of latent HIV moves shock-and-kill treatments forward.  
662 *Nature.* 2020;578(7793):42-3. Epub 2020/02/06. doi: 10.1038/d41586-020-00010-x.  
663 PubMed PMID: 32020104.

664 10. McMahon DK, Zheng L, Cyktor JC, Aga E, Macatangay BJ, Godfrey C, et al. A  
665 phase I/II randomized, placebo-controlled trial of romidepsin in persons with HIV-1 on  
666 suppressive antiretroviral therapy to assess safety and activation of HIV-1 expression  
667 (A5315). *J Infect Dis.* 2020. Epub 2020/12/23. doi: 10.1093/infdis/jiaa777. PubMed PMID:  
668 33349862.

- 669 11. Gunst JD, Højen JF, Søgaard OS. Broadly neutralizing antibodies combined with  
670 latency-reversing agents or immune modulators as strategy for HIV-1 remission. *Curr*  
671 *Opin HIV AIDS*. 2020;15(5):309-15. Epub 2020/07/18. doi:  
672 10.1097/coh.0000000000000641. PubMed PMID: 32675575.
- 673 12. Herzig E, Kim KC, Packard TA, Vardi N, Schwarzer R, Gramatica A, et al. Attacking  
674 Latent HIV with convertible CAR-T Cells, a Highly Adaptable Killing Platform. *Cell*.  
675 2019;179(4):880-94.e10. Epub 2019/11/02. doi: 10.1016/j.cell.2019.10.002. PubMed  
676 PMID: 31668804; PubMed Central PMCID: PMC6922308.
- 677 13. Powell AB, Ren Y, Korom M, Saunders D, Hanley PJ, Goldstein H, et al.  
678 Engineered Antigen-Specific T Cells Secreting Broadly Neutralizing Antibodies:  
679 Combining Innate and Adaptive Immune Response against HIV. *Mol Ther Methods Clin*  
680 *Dev*. 2020;19:78-88. Epub 2020/10/03. doi: 10.1016/j.omtm.2020.08.015. PubMed PMID:  
681 33005704; PubMed Central PMCID: PMC6922308.
- 682 14. Kessing CF, Nixon CC, Li C, Tsai P, Takata H, Mousseau G, et al. In Vivo  
683 Suppression of HIV Rebound by Didehydro-Cortistatin A, a "Block-and-Lock" Strategy for  
684 HIV-1 Treatment. *Cell Rep*. 2017;21(3):600-11. doi: 10.1016/j.celrep.2017.09.080.  
685 PubMed PMID: 29045830; PubMed Central PMCID: PMC5653276.
- 686 15. Vansant G, Bruggemans A, Janssens J, Debyser Z. Block-And-Lock Strategies to  
687 Cure HIV Infection. *Viruses*. 2020;12(1). Epub 2020/01/16. doi: 10.3390/v12010084.  
688 PubMed PMID: 31936859; PubMed Central PMCID: PMC7019976.

- 689 16. Ahlenstiel CL, Symonds G, Kent SJ, Kelleher AD. Block and Lock HIV Cure  
690 Strategies to Control the Latent Reservoir. *Front Cell Infect Microbiol.* 2020;10:424. Epub  
691 2020/09/15. doi: 10.3389/fcimb.2020.00424. PubMed PMID: 32923412; PubMed Central  
692 PMCID: PMCPMC7457024.
- 693 17. Li C, Mori L, Valente ST. The Block-and-Lock Strategy for Human  
694 Immunodeficiency Virus Cure: Lessons Learned from Didehydro-Cortistatin A. *J Infect*  
695 *Dis.* 2021;223(Supplement\_1):46-53. Epub 2021/02/16. doi: 10.1093/infdis/jiaa681.  
696 PubMed PMID: 33586776; PubMed Central PMCID: PMCPMC7883021.
- 697 18. Li C, Mousseau G, Valente ST. Tat inhibition by didehydro-Cortistatin A promotes  
698 heterochromatin formation at the HIV-1 long terminal repeat. *Epigenetics Chromatin.*  
699 2019;12(1):23. Epub 2019/04/18. doi: 10.1186/s13072-019-0267-8. PubMed PMID:  
700 30992052; PubMed Central PMCID: PMCPMC6466689.
- 701 19. Kessing CF, Nixon CC, Li C, Tsai P, Takata H, Mousseau G, et al. In Vivo  
702 Suppression of HIV Rebound by Didehydro-Cortistatin A, a "Block-and-Lock" Strategy for  
703 HIV-1 Treatment. *Cell Rep.* 2017;21(3):600-11. Epub 2017/10/19. doi:  
704 10.1016/j.celrep.2017.09.080. PubMed PMID: 29045830; PubMed Central PMCID:  
705 PMCPMC5653276.
- 706 20. Mousseau G, Kessing CF, Fromentin R, Trautmann L, Chomont N, Valente ST.  
707 The Tat Inhibitor Didehydro-Cortistatin A Prevents HIV-1 Reactivation from Latency.  
708 *MBio.* 2015;6(4):e00465. Epub 2015/07/15. doi: 10.1128/mBio.00465-15. PubMed PMID:  
709 26152583; PubMed Central PMCID: PMCPMC4495168.

- 710 21. Mbonye U, Karn J. The Molecular Basis for Human Immunodeficiency Virus  
711 Latency. *Annu Rev Virol.* 2017;4(1):261-85. doi: 10.1146/annurev-virology-101416-  
712 041646. PubMed PMID: 28715973.
- 713 22. Dobrowolski C, Valadkhan S, Graham AC, Shukla M, Ciuffi A, Telenti A, et al. Entry  
714 of Polarized Effector Cells into Quiescence Forces HIV Latency. *MBio.* 2019;10(2). Epub  
715 2019/03/28. doi: 10.1128/mBio.00337-19. PubMed PMID: 30914509.
- 716 23. Nguyen K, Das B, Dobrowolski C, Karn J. Multiple Histone Lysine  
717 Methyltransferases Are Required for the Establishment and Maintenance of HIV-1  
718 Latency. *MBio.* 2017;8(1). doi: 10.1128/mBio.00133-17. PubMed PMID: 28246360;  
719 PubMed Central PMCID: PMC5347344.
- 720 24. Friedman J, Cho WK, Chu CK, Keedy KS, Archin NM, Margolis DM, et al.  
721 Epigenetic silencing of HIV-1 by the histone H3 lysine 27 methyltransferase enhancer of  
722 Zeste 2. *J Virol.* 2011;85(17):9078-89. doi: 10.1128/JVI.00836-11. PubMed PMID:  
723 21715480; PubMed Central PMCID: PMC3165831.
- 724 25. Olson A, Basukala B, Lee S, Gagne M, Wong WW, Henderson AJ. Targeted  
725 Chromatinization and Repression of HIV-1 Provirus Transcription with Repurposed  
726 CRISPR/Cas9. *Viruses.* 2020;12(10). Epub 2020/10/16. doi: 10.3390/v12101154.  
727 PubMed PMID: 33053801; PubMed Central PMCID: PMC7600714.
- 728 26. Boehm D, Ott M. Host Methyltransferases and Demethylases: Potential New  
729 Epigenetic Targets for HIV Cure Strategies and Beyond. *AIDS Res Hum Retroviruses.*

730 2017;33(S1):S8-s22. Epub 2017/11/16. doi: 10.1089/aid.2017.0180. PubMed PMID:  
731 29140109; PubMed Central PMCID: PMC5684665.

732 27. Boehm D, Jeng M, Camus G, Gramatica A, Schwarzer R, Johnson JR, et al.  
733 SMYD2-Mediated Histone Methylation Contributes to HIV-1 Latency. *Cell Host Microbe*.  
734 2017;21(5):569-79 e6. doi: 10.1016/j.chom.2017.04.011. PubMed PMID: 28494238;  
735 PubMed Central PMCID: PMC5490666.

736 28. Kumar A, Darcis G, Van Lint C, Herbein G. Epigenetic control of HIV-1 post  
737 integration latency: implications for therapy. *Clinical epigenetics*. 2015;7:103. Epub  
738 2015/09/26. doi: 10.1186/s13148-015-0137-6. PubMed PMID: 26405463; PubMed  
739 Central PMCID: PMC4581042.

740 29. Tyagi M, Pearson RJ, Karn J. Establishment of HIV latency in primary CD4+ cells  
741 is due to epigenetic transcriptional silencing and P-TEFb restriction. *J Virol*.  
742 2010;84(13):6425-37. doi: 10.1128/JVI.01519-09. PubMed PMID: 20410271; PubMed  
743 Central PMCID: PMC2903277.

744 30. Turner AW, Dronamraju R, Potjewyd F, James KS, Winecoff DK, Kirchherr JL, et  
745 al. Evaluation of EED Inhibitors as a Class of PRC2-Targeted Small Molecules for HIV  
746 Latency Reversal. *ACS Infect Dis*. 2020;6(7):1719-33. Epub 2020/04/30. doi:  
747 10.1021/acsinfecdis.9b00514. PubMed PMID: 32347704; PubMed Central PMCID:  
748 PMC57359025.

749 31. Krasnopolsky S, Kuzmina A, Taube R. Genome-wide CRISPR knockout screen  
750 identifies ZNF304 as a silencer of HIV transcription that promotes viral latency. *PLoS*

- 751 Pathog. 2020;16(9):e1008834. Epub 2020/09/22. doi: 10.1371/journal.ppat.1008834.  
752 PubMed PMID: 32956422; PubMed Central PMCID: PMCPMC7529202.
- 753 32. Lindqvist B, Svensson Akusjärvi S, Sönnernborg A, Dimitriou M, Svensson JP.  
754 Chromatin maturation of the HIV-1 provirus in primary resting CD4+ T cells. PLoS Pathog.  
755 2020;16(1):e1008264. Epub 2020/01/31. doi: 10.1371/journal.ppat.1008264. PubMed  
756 PMID: 31999790; PubMed Central PMCID: PMCPMC6991963.
- 757 33. Zapata JC, Campilongo F, Barclay RA, DeMarino C, Iglesias-Ussel MD, Kashanchi  
758 F, et al. The Human Immunodeficiency Virus 1 ASP RNA promotes viral latency by  
759 recruiting the Polycomb Repressor Complex 2 and promoting nucleosome assembly.  
760 Virology. 2017;506:34-44. Epub 2017/03/25. doi: 10.1016/j.virol.2017.03.002. PubMed  
761 PMID: 28340355; PubMed Central PMCID: PMCPMC5505171.
- 762 34. Swigut T, Wysocka J. H3K27 demethylases, at long last. Cell. 2007;131(1):29-32.  
763 doi: 10.1016/j.cell.2007.09.026. PubMed PMID: 17923085.
- 764 35. Agger K, Cloos PA, Christensen J, Pasini D, Rose S, Rappsilber J, et al. UTX and  
765 JMJD3 are histone H3K27 demethylases involved in HOX gene regulation and  
766 development. Nature. 2007;449(7163):731-4. doi: 10.1038/nature06145. PubMed PMID:  
767 17713478.
- 768 36. Dhar SS, Lee SH, Chen K, Zhu G, Oh W, Allton K, et al. An essential role for UTX  
769 in resolution and activation of bivalent promoters. Nucleic Acids Res. 2016;44(8):3659-  
770 74. doi: 10.1093/nar/gkv1516. PubMed PMID: 26762983; PubMed Central PMCID:  
771 PMCPMC4856969.

- 772 37. Taube JH, Sphyris N, Johnson KS, Reisenauer KN, Nesbit TA, Joseph R, et al.  
773 The H3K27me3-demethylase KDM6A is suppressed in breast cancer stem-like cells, and  
774 enables the resolution of bivalency during the mesenchymal-epithelial transition.  
775 *Oncotarget*. 2017;8(39):65548-65. doi: 10.18632/oncotarget.19214. PubMed PMID:  
776 29029452; PubMed Central PMCID: PMC5630352.
- 777 38. Moore LD, Le T, Fan G. DNA methylation and its basic function.  
778 *Neuropsychopharmacology*. 2013;38(1):23-38.
- 779 39. Xie W, Barr CL, Kim A, Yue F, Lee AY, Eubanks J, et al. Base-resolution analyses  
780 of sequence and parent-of-origin dependent DNA methylation in the mouse genome. *Cell*.  
781 2012;148(4):816-31.
- 782 40. Achour M, Jacq X, Ronde P, Alhosin M, Charlot C, Chataigneau T, et al. The  
783 interaction of the SRA domain of ICBP90 with a novel domain of DNMT1 is involved in  
784 the regulation of VEGF gene expression. *Oncogene*. 2008;27(15):2187-97. doi:  
785 10.1038/sj.onc.1210855. PubMed PMID: 17934516.
- 786 41. Lopes EC, Valls E, Figueroa ME, Mazur A, Meng FG, Chiosis G, et al. Kaiso  
787 contributes to DNA methylation-dependent silencing of tumor suppressor genes in colon  
788 cancer cell lines. *Cancer Res*. 2008;68(18):7258-63. doi: 10.1158/0008-5472.CAN-08-  
789 0344. PubMed PMID: 18794111.
- 790 42. Jones PA. Functions of DNA methylation: islands, start sites, gene bodies and  
791 beyond. *Nat Rev Genet*. 2012;13(7):484-92. doi: 10.1038/nrg3230. PubMed PMID:  
792 22641018.

- 793 43. Blazkova J, Trejbalova K, Gondois-Rey F, Halfon P, Philibert P, Guiguen A, et al.  
794 CpG methylation controls reactivation of HIV from latency. *PLoS Pathog.*  
795 2009;5(8):e1000554. PubMed PMID: 19696893.
- 796 44. Kauder SE, Bosque A, Lindqvist A, Planelles V, Verdin E. Epigenetic regulation of  
797 HIV-1 latency by cytosine methylation. *PLoS Pathog.* 2009;5(6):e1000495. PubMed  
798 PMID: 19557157.
- 799 45. Blazkova J, Murray D, Justement JS, Funk EK, Nelson A, Moir S, et al. Paucity of  
800 HIV DNA Methylation in Latently Infected, Resting CD4+ T Cells from Infected Individuals  
801 Receiving Antiretroviral Therapy. *J Virol.* 2012;86(9):5390-2. Epub 2012/02/22. doi:  
802 10.1128/JVI.00040-12. PubMed PMID: 22345448.
- 803 46. Palacios JA, Perez-Pinar T, Toro C, Sanz-Minguela B, Moreno V, Valencia E, et  
804 al. Long-term nonprogressor and elite controller patients who control viremia have a  
805 higher percentage of methylation in their HIV-1 proviral promoters than aviremic patients  
806 receiving highly active antiretroviral therapy. *J Virol.* 2012;86(23):13081-4. Epub  
807 2012/09/14. doi: 10.1128/JVI.01741-12. PubMed PMID: 22973038; PubMed Central  
808 PMCID: PMC3497688.
- 809 47. Pearson R, Kim YK, Hokello J, Lassen K, Friedman J, Tyagi M, et al. Epigenetic  
810 silencing of human immunodeficiency virus (HIV) transcription by formation of restrictive  
811 chromatin structures at the viral long terminal repeat drives the progressive entry of HIV  
812 into latency. *J Virol.* 2008;82(24):12291-303. PubMed PMID: 18829756.



- 813 48. Zhang HS, Du GY, Liu Y, Zhang ZG, Zhou Z, Li H, et al. UTX-1 regulates Tat-  
814 induced HIV-1 transactivation via changing the methylated status of histone H3. *Int J*  
815 *Biochem Cell Biol.* 2016;80:51-6. doi: 10.1016/j.biocel.2016.09.016. PubMed PMID:  
816 27671333.
- 817 49. Jadowsky JK, Wong JY, Graham AC, Dobrowolski C, Devor RL, Adams MD, et  
818 al. Negative elongation factor is required for the maintenance of proviral latency but does  
819 not induce promoter-proximal pausing of RNA polymerase II on the HIV long terminal  
820 repeat. *Mol Cell Biol.* 2014;34(11):1911-28. doi: 10.1128/MCB.01013-13. PubMed PMID:  
821 24636995; PubMed Central PMCID: PMC4019061.
- 822 50. Voigt P, Tee WW, Reinberg D. A double take on bivalent promoters. *Genes Dev.*  
823 2013;27(12):1318-38. doi: 10.1101/gad.219626.113. PubMed PMID: 23788621; PubMed  
824 Central PMCID: PMC3701188.
- 825 51. Blanco E, Gonzalez-Ramirez M, Alcaine-Colet A, Aranda S, Di Croce L. The  
826 Bivalent Genome: Characterization, Structure, and Regulation. *Trends Genet.*  
827 2020;36(2):118-31. Epub 2019/12/11. doi: 10.1016/j.tig.2019.11.004. PubMed PMID:  
828 31818514.
- 829 52. Lewis PW, Muller MM, Koletsky MS, Cordero F, Lin S, Banaszynski LA, et al.  
830 Inhibition of PRC2 activity by a gain-of-function H3 mutation found in pediatric  
831 glioblastoma. *Science.* 2013;340(6134):857-61. doi: 10.1126/science.1232245. PubMed  
832 PMID: 23539183; PubMed Central PMCID: PMC3951439.

- 833 53. Bender S, Tang Y, Lindroth AM, Hovestadt V, Jones DT, Kool M, et al. Reduced  
834 H3K27me3 and DNA hypomethylation are major drivers of gene expression in K27M  
835 mutant pediatric high-grade gliomas. *Cancer Cell*. 2013;24(5):660-72. doi:  
836 10.1016/j.ccr.2013.10.006. PubMed PMID: 24183680.
- 837 54. Fontebasso AM, Papillon-Cavanagh S, Schwartzentruber J, Nikbakht H, Gerges  
838 N, Fiset PO, et al. Recurrent somatic mutations in ACVR1 in pediatric midline high-grade  
839 astrocytoma. *Nat Genet*. 2014;46(5):462-6. doi: 10.1038/ng.2950. PubMed PMID:  
840 24705250; PubMed Central PMCID: PMC4282994.
- 841 55. Sturm D, Witt H, Hovestadt V, Khuong-Quang DA, Jones DT, Konermann C, et al.  
842 Hotspot mutations in H3F3A and IDH1 define distinct epigenetic and biological subgroups  
843 of glioblastoma. *Cancer Cell*. 2012;22(4):425-37. doi: 10.1016/j.ccr.2012.08.024.  
844 PubMed PMID: 23079654.
- 845 56. Trejbalova K, Kovarova D, Blazkova J, Machala L, Jilich D, Weber J, et al.  
846 Development of 5' LTR DNA methylation of latent HIV-1 provirus in cell line models and  
847 in long-term-infected individuals. *Clin Epigenetics*. 2016;8:19. doi: 10.1186/s13148-016-  
848 0185-6. PubMed PMID: 26900410; PubMed Central PMCID: PMC4759744.
- 849 57. Leung DC, Dong KB, Maksakova IA, Goyal P, Appanah R, Lee S, et al. Lysine  
850 methyltransferase G9a is required for de novo DNA methylation and the establishment,  
851 but not the maintenance, of proviral silencing. *Proc Natl Acad Sci U S A*.  
852 2011;108(14):5718-23. Epub 2011/03/24. doi: 10.1073/pnas.1014660108. PubMed  
853 PMID: 21427230; PubMed Central PMCID: PMC3078371.

- 854 58. Pion M, Jordan A, Biancotto A, Dequiedt F, Gondois-Rey F, Rondeau S, et al.  
855 Transcriptional suppression of in vitro-integrated human immunodeficiency virus type 1  
856 does not correlate with proviral DNA methylation. *J Virol.* 2003;77:4025-32.
- 857 59. Stresemann C, Lyko F. Modes of action of the DNA methyltransferase inhibitors  
858 azacytidine and decitabine. *Int J Cancer.* 2008;123(1):8-13. doi: 10.1002/ijc.23607.  
859 PubMed PMID: 18425818.
- 860 60. Chavez L, Kauder S, Verdin E. In vivo, in vitro, and in silico analysis of methylation  
861 of the HIV-1 provirus. *Methods.* 2011;53(1):47-53. doi: 10.1016/j.ymeth.2010.05.009.  
862 PubMed PMID: 20670606; PubMed Central PMCID: PMC3566233.
- 863 61. Das B, Dobrowolski C, Luttge B, Valadkhan S, Chomont N, Johnston R, et al.  
864 Estrogen receptor-1 is a key regulator of HIV-1 latency that imparts gender-specific  
865 restrictions on the latent reservoir. *Proc Natl Acad Sci U S A.* 2018;115(33):E7795-E804.  
866 doi: 10.1073/pnas.1803468115. PubMed PMID: 30061382; PubMed Central PMCID:  
867 PMCPMC6099847.
- 868 62. Blazkova J, Murray D, Justement JS, Funk EK, Nelson AK, Moir S, et al. Paucity  
869 of HIV DNA methylation in latently infected, resting CD4+ T cells from infected individuals  
870 receiving antiretroviral therapy. *J Virol.* 2012;86(9):5390-2. doi: 10.1128/JVI.00040-12.  
871 PubMed PMID: 22345448; PubMed Central PMCID: PMC3347337.
- 872 63. Palacios JA, Perez-Pinar T, Toro C, Sanz-Minguela B, Moreno V, Valencia E, et  
873 al. Long-term nonprogressor and elite controller patients who control viremia have a  
874 higher percentage of methylation in their HIV-1 proviral promoters than aviremic patients

875 receiving highly active antiretroviral therapy. *J Virol.* 2012;86(23):13081-4. doi:  
876 10.1128/JVI.01741-12. PubMed PMID: 22973038; PubMed Central PMCID:  
877 PMCPMC3497688.

878 64. Weber S, Weiser B, Kemal KS, Burger H, Ramirez CM, Korn K, et al. Epigenetic  
879 analysis of HIV-1 proviral genomes from infected individuals: predominance of  
880 unmethylated CpG's. *Virology.* 2014;449:181-9. doi: 10.1016/j.virol.2013.11.013.  
881 PubMed PMID: 24418551; PubMed Central PMCID: PMCPMC4060985.

882 65. Ho YC, Shan L, Hosmane NN, Wang J, Laskey SB, Rosenbloom DI, et al.  
883 Replication-competent noninduced proviruses in the latent reservoir increase barrier to  
884 HIV-1 cure. *Cell.* 2013;155(3):540-51. doi: 10.1016/j.cell.2013.09.020. PubMed PMID:  
885 24243014; PubMed Central PMCID: PMCPMC3896327.

886 66. Issaeva I, Zonis Y, Rozovskaia T, Orlovsky K, Croce CM, Nakamura T, et al.  
887 Knockdown of ALR (MLL2) reveals ALR target genes and leads to alterations in cell  
888 adhesion and growth. *Mol Cell Biol.* 2007;27(5):1889-903. doi: 10.1128/MCB.01506-06.  
889 PubMed PMID: 17178841; PubMed Central PMCID: PMCPMC1820476.

890 67. Kimpton J, Emerman M. Detection of replication-competent and pseudotyped  
891 human immunodeficiency virus with a sensitive cell line on the basis of activation of an  
892 integrated beta-galactosidase gene. *J Virol.* 1992;66(4):2232-9. PubMed PMID: 1548759;  
893 PubMed Central PMCID: PMCPMC289016.

- 894 68. Bernstein BE, Mikkelsen TS, Xie X, Kamal M, Huebert DJ, Cuff J, et al. A bivalent  
895 chromatin structure marks key developmental genes in embryonic stem cells. *Cell*.  
896 2006;125(2):315-26. doi: 10.1016/j.cell.2006.02.041. PubMed PMID: 16630819.
- 897 69. Mikkelsen TS, Ku M, Jaffe DB, Issac B, Lieberman E, Giannoukos G, et al.  
898 Genome-wide maps of chromatin state in pluripotent and lineage-committed cells. *Nature*.  
899 2007;448(7153):553-60. doi: 10.1038/nature06008. PubMed PMID: 17603471; PubMed  
900 Central PMCID: PMCPMC2921165.
- 901 70. Kauder SE, Bosque A, Lindqvist A, Planelles V, Verdin E. Epigenetic regulation of  
902 HIV-1 latency by cytosine methylation. *PLoS Pathog*. 2009;5(6):e1000495. doi:  
903 10.1371/journal.ppat.1000495. PubMed PMID: 19557157; PubMed Central PMCID:  
904 PMCPMC2695767.
- 905 71. Meissner A, Mikkelsen TS, Gu H, Wernig M, Hanna J, Sivachenko A, et al.  
906 Genome-scale DNA methylation maps of pluripotent and differentiated cells. *Nature*.  
907 2008;454(7205):766-70. doi: 10.1038/nature07107. PubMed PMID: 18600261; PubMed  
908 Central PMCID: PMCPMC2896277.
- 909 72. Brunner AL, Johnson DS, Kim SW, Valouev A, Reddy TE, Neff NF, et al. Distinct  
910 DNA methylation patterns characterize differentiated human embryonic stem cells and  
911 developing human fetal liver. *Genome Res*. 2009;19(6):1044-56. doi:  
912 10.1101/gr.088773.108. PubMed PMID: 19273619; PubMed Central PMCID:  
913 PMCPMC2694474.

- 914 73. Gal-Yam EN, Egger G, Iniguez L, Holster H, Einarsson S, Zhang X, et al. Frequent  
915 switching of Polycomb repressive marks and DNA hypermethylation in the PC3 prostate  
916 cancer cell line. *Proc Natl Acad Sci U S A*. 2008;105(35):12979-84. doi:  
917 10.1073/pnas.0806437105. PubMed PMID: 18753622; PubMed Central PMCID:  
918 PMCPMC2529074.
- 919 74. Takeshima H, Yamashita S, Shimazu T, Niwa T, Ushijima T. The presence of RNA  
920 polymerase II, active or stalled, predicts epigenetic fate of promoter CpG islands.  
921 *Genome Res*. 2009;19(11):1974-82. doi: 10.1101/gr.093310.109. PubMed PMID:  
922 19652013; PubMed Central PMCID: PMCPMC2775588.
- 923 75. Hahn MA, Hahn T, Lee DH, Esworthy RS, Kim BW, Riggs AD, et al. Methylation  
924 of polycomb target genes in intestinal cancer is mediated by inflammation. *Cancer Res*.  
925 2008;68(24):10280-9. doi: 10.1158/0008-5472.CAN-08-1957. PubMed PMID: 19074896;  
926 PubMed Central PMCID: PMCPMC2491345.
- 927 76. Statham AL, Robinson MD, Song JZ, Coolen MW, Stirzaker C, Clark SJ. Bisulfite  
928 sequencing of chromatin immunoprecipitated DNA (BisChIP-seq) directly informs  
929 methylation status of histone-modified DNA. *Genome Res*. 2012;22(6):1120-7. doi:  
930 10.1101/gr.132076.111. PubMed PMID: 22466171; PubMed Central PMCID:  
931 PMCPMC3371705.
- 932 77. Deng J, Qu X, Lu P, Yang X, Zhu Y, Ji H, et al. Specific and Stable Suppression  
933 of HIV Provirus Expression In Vitro by Chimeric Zinc Finger DNA Methyltransferase 1.  
934 *Mol Ther Nucleic Acids*. 2017;6:233-42. doi: 10.1016/j.omtn.2017.01.002. PubMed PMID:  
935 28325289; PubMed Central PMCID: PMCPMC5363508.

936 78. Bernhart SH, Kretzmer H, Holdt LM, Juhling F, Ammerpohl O, Bergmann AK, et  
937 al. Changes of bivalent chromatin coincide with increased expression of developmental  
938 genes in cancer. *Sci Rep.* 2016;6:37393. doi: 10.1038/srep37393. PubMed PMID:  
939 27876760; PubMed Central PMCID: PMC5120258.

940 79. Cotton AM, Price EM, Jones MJ, Balaton BP, Kobor MS, Brown CJ. Landscape of  
941 DNA methylation on the X chromosome reflects CpG density, functional chromatin state  
942 and X-chromosome inactivation. *Hum Mol Genet.* 2015;24(6):1528-39. doi:  
943 10.1093/hmg/ddu564. PubMed PMID: 25381334; PubMed Central PMCID:  
944 PMC4381753.

945 80. Hurst TP, Magiorkinis G. Epigenetic Control of Human Endogenous Retrovirus  
946 Expression: Focus on Regulation of Long-Terminal Repeats (LTRs). *Viruses.* 2017;9(6).  
947 doi: 10.3390/v9060130. PubMed PMID: 28561791; PubMed Central PMCID:  
948 PMC5490807.

949 81. Lavie L, Kitova M, Maldener E, Meese E, Mayer J. CpG methylation directly  
950 regulates transcriptional activity of the human endogenous retrovirus family HERV-  
951 K(HML-2). *J Virol.* 2005;79(2):876-83. doi: 10.1128/JVI.79.2.876-883.2005. PubMed  
952 PMID: 15613316; PubMed Central PMCID: PMC538560.

953 82. Pflueger C, Tan D, Swain T, Nguyen T, Pflueger J, Nefzger C, et al. A modular  
954 dCas9-SunTag DNMT3A epigenome editing system overcomes pervasive off-target  
955 activity of direct fusion dCas9-DNMT3A constructs. *Genome Res.* 2018;28(8):1193-206.  
956 doi: 10.1101/gr.233049.117. PubMed PMID: 29907613; PubMed Central PMCID:  
957 PMC6071642.

- 958 83. Martinez-Colom A, Lasarte S, Fernandez-Pineda A, Relloso M, Munoz-Fernandez  
959 MA. A new chimeric protein represses HIV-1 LTR-mediated expression by DNA  
960 methylase. *Antiviral Res.* 2013;98(3):394-400. doi: 10.1016/j.antiviral.2013.04.007.  
961 PubMed PMID: 23588231.
- 962 84. Itou D, Shiromoto Y, Yukiho SY, Ishii C, Nishimura T, Ogonuki N, et al. Induction  
963 of DNA methylation by artificial piRNA production in male germ cells. *Curr Biol.*  
964 2015;25(7):901-6. doi: 10.1016/j.cub.2015.01.060. PubMed PMID: 25772451.
- 965 85. Kumaki Y, Oda M, Okano M. QUMA: quantification tool for methylation analysis.  
966 *Nucleic Acids Res.* 2008;36(Web Server issue):W170-5. doi: 10.1093/nar/gkn294.  
967 PubMed PMID: 18487274; PubMed Central PMCID: PMC2447804.
- 968



## 969 **Figure legends**

### 970 **Fig 1. Inhibition of HIV-1 reactivation in UTX knocked down E4 cells.**

971 (A) Representative FACS measuring d2EGFP expression in two UTX knocked down  
972 clones from E4 cells stimulated with TNF $\alpha$  (10 ng/ml) overnight. (B) Quantification of HIV-  
973 1 reactivation in two clones from UTX knocked down E4 cells, UTX knocked down 2D10,  
974 and UTX knocked down 3C9 cells stimulated with indicated conditions. 3C9 cells harbors  
975 Nef+, Wt Tat HIV, while 2D10 cells are infected with H13L mutant Tat HIV-1. Error bars:  
976 SEM of 3 separate experiments. (C) d2EGFP expression in UTX knocked down E4 clones  
977 left untreated or stimulated with SAHA (2  $\mu$ M) overnight. Two tailed, Mann Whitney test  
978 was used for statistical calculation. (D) Western blot measuring the levels of UTX and  
979 H3K27me3 in E4 cells expressing scramble or UTX shRNAs.

### 980 **Fig 2. UTX functions as a transcription activator of HIV-1 transcription.**

981 ChIP assays measuring the enrichments of (A) RNAPII, (B) UTX, (C) EZH2 and (D)  
982 H3K27me3 at the nuc0, HIV-1 promoter, and nuc1 regions of latent or reactivated HIV-1.  
983 Latent proviruses in E4 cells were reactivated by TNF $\alpha$  (10 ng/ml) for an hour. ChIP  
984 assays measuring the enrichment of (E) RNAPII and (F) UTX along HIV-1 genome in one  
985 UTX knocked down clone. Error bars: SEM of 3 separate quantitative real-time PCRs.

### 986 **Fig 3. Inhibition of UTX demethylase activity by GSK-J4 prevents HIV-1 reactivation** 987 **in Jurkat T cells.**

988 (A) Quantification of d2EGFP expression in E4 and 3C9 cells pretreated with increasing  
989 concentrations of GSK-J4 for 24 hours and stimulated with SAHA (2  $\mu$ M) or TNF $\alpha$  (10  
990 ng/ml) overnight. Error bars: SEM of 5 separate experiments. One-way ANOVA, P <0.05,  
991 Bonferroni posttests \* p < 0.05, \*\* p<0.01, \*\*\* p<0.001, n=5. ChIP assays measuring the

992 enrichments of (B) RNAPII, (C) H3K4me3 and (D) H3K27me3 at the 5'LTR of HIV-1 when  
993 latent proviruses were left unstimulated or reactivated for an hour by TNF $\alpha$  (10 ng/ml)  
994 with or without the presence of GSK-J4 (10  $\mu$ M). E4 cells were pretreated for 24 hours  
995 with GSK-J4 (10  $\mu$ M) then further stimulated with TNF $\alpha$  (10 ng/ml) for an hour. Error bars:  
996 SEM of 3 separate quantitative real-time PCRs.

997 **Fig 4. H3K4 methylation is crucial for HIV-1 reactivation mediated by H3K27**  
998 **removal.**

999 (A) Western blot measuring the indicated histone H3 methylation levels of cells  
1000 expressing HA tagged wild type (wt) H3.3 or indicated mutants of H3.3. The upper bands  
1001 (marked with \*) from blots with antibodies against H3K27me3 and H3 are from the H3.3-  
1002 HA variants (B) Quantification of HIV-1 reactivation in E4 cells expressing wt H3.3 or  
1003 indicated H3.3 mutants. Presented statistical significance was based on comparison with  
1004 H3.3 K27M variant. One-way ANOVA, n=5 p<0.005, Bonferroni posttests, \* p<0.05, \*\*  
1005 p<0.01, \*\*\* p<0.001. Error bars: SEM of 5 different replications.

1006 **Fig 5. Depletion of UTX elevates DNA methylation levels of latent HIV-1 in Jurkat T**  
1007 **cells due to enhanced recruitment of DNMT3A to HIV-1 5'LTR**

1008 (A) The map indicates the positions of CpG islands and primer binding sites along HIV-1  
1009 genome. (B) HIV-1 reactivation in UTX knocked down cells treated with 5-AZC. E4 cells  
1010 were pretreated with 1  $\mu$ M 5-AZC for 72 hours then left untreated or treated further with  
1011 a combination of anti-CD3 (125 ng/ml) and anti-CD28 (500 ng/ml), 500 nM of SAHA, or 1  
1012 ng/ml of TNF $\alpha$  overnight. HIV-1 reactivation in the cells was measured by FACS. Error  
1013 bars: SEM of at least 3 separate replicates. T-test, n=3 \* p < 0.05. (C) MeDIP assay  
1014 measuring the levels of methylated cytosine of HIV-1 in UTX knock down E4 cells or E4

1015 cells treated with 10  $\mu$ M of GSK-J4 for 48 hours. Error bars: SEM of 3 separate  
1016 quantitative real-time PCRs. (D) Expression levels of DNMT3A in E4 cells transduced  
1017 with lentiviruses harboring *Dnmt3a*-3xFlag and ChIP assays performed on cells treated  
1018 with indicated conditions using Flag MS2 magnetic beads to pull down DNMT3A-3xFlag  
1019 proteins. Cells were transduced and selected by puromycin (2  $\mu$ g/ml) for 3 days. Before  
1020 ChIP, cells were treated with GSK-J4 for 48 hours. Error bars: SEM of 3 separate  
1021 quantitative real-time PCRs. (E) DNA demethylases TET1 and TET2 are involved in HIV-  
1022 1 reactivation in Jurkat T cells. Reactivation of latent HIV-1 induced overnight by SAHA  
1023 (1  $\mu$ M) or TNF $\alpha$  (10 ng/ml) in TET1 or TET2 knocked-out E4 cells. Error bars: SEM of 3  
1024 separate triplicates. One-way ANOVA,  $p < 0.05$  Bonferroni posttests,  $n=3$  \*  $p < 0.05$ .

1025 **Fig 6. Inhibition of UTX by GSK-J4 promotes the silencing of HIV-1 in Th17 primary**  
1026 **cells and elevates HIV-1 DNA methylation.**

1027 (A) Schematic of experimental design. (B) Relative levels of H3K27me3 compared to  
1028 histone H3 levels quantified from Western blot on treated Th17 cells from 4 donors at Day  
1029 4. One-tailed, paired t-test, \*  $p < 0.05$ . (C) Silencing kinetics of HIV-1 in Th17 cells from 4  
1030 different donors in the presence of 0  $\mu$ M (vehicle) or 1  $\mu$ M of GSK-J4. Error bars: SEM of  
1031 at least 3 separate biological replicates. Two-way ANOVA, Bonferroni posttests, \*  $p < 0.05$   
1032 \*\*  $p < 0.01$ . (D) MeDIP measuring the levels of methylated cytosine of HIV-1 at Day 4. Error  
1033 bars: SEM of 4 different donors. One-tailed, paired t-test,  $n=4$ , \*  $p < 0.05$ . (E) GSK-J4  
1034 inhibits the reactivation of latent HIV-1 by SAHA & IL15 or TCR stimulation in Th17  
1035 primary cells. Cells were pretreated for 48 hours with GSK-J4, then further stimulated  
1036 overnight with SAHA & IL15 or Human T-Activator CD3/CD28 Dynabeads with the ratio  
1037 of 25  $\mu$ l of beads per 1 million cells. Quantification of HIV-1 reactivation under the

1038 indicated conditions. Error bars: SEM of 3 separate triplicates. One-way ANOVA,  
1039 Bonferroni posttests  $n > 3$ .

1040 **Fig 7. GSK-J4 inhibits reactivation of latent HIV-1 in CD4 memory T cells isolated**  
1041 **from well suppressed HIV-1 infected donors.**

1042 (A) Schematic diagrams describing the experimental designs. (B) Inhibition of latent HIV-  
1043 1 reactivation in CD4<sup>+</sup> memory T cells from HIV-1 infected patients on HAARTs by UTX  
1044 inhibitor. CD4<sup>+</sup> memory T cells isolated from HIV-1 infected patients were treated for 3  
1045 days with indicated concentrations of GSK-J4. Cells were left untreated or further treated  
1046 with human T-Activator CD3/CD28 Dynabeads overnight. Levels of spliced HIV-1 env  
1047 mRNA were measured by EDITS assays. Levels of relative reactivation were normalized  
1048 to the levels of spliced HIV-1 env mRNA induced by human T-Activator CD3/CD28  
1049 Dynabeads (presented as 100%) for each donor. (C) Expression levels of CD69 from  
1050 treated CD4<sup>+</sup> memory T cells measured by FACS using CD69 antibody. One-way  
1051 ANOVA  $p < 0.005$ , Bonferroni posttests \*  $p < 0.05$  \*\*  $p < 0.01$  \*\*\*  $p < 0.001$  was performed  
1052 for both Figure 7B & 7C. (D) Intracellular H3K27me3 levels of treated CD4<sup>+</sup> memory T  
1053 cells measured by FACS using a H3K27me3 antibody. Cells were stained with Alexa  
1054 Fluor 647-conjugated trimethyl histone H3 (Lys27) antibody (12158, Cell Signaling) and  
1055 analyzed by FACS as described previously [23]. (E) Viability of cells by PI staining. After  
1056 drug treatment, cells were stained with PI at the final concentration of 5  $\mu\text{g/ml}$  for 5  
1057 minutes, then analyzed by FACS. Two-tailed paired t-test was performed for both Figure  
1058 7D & 7E, \*  $p < 0.05$ , ns: not statistically significant.

1059 **Fig 8. Temporary induction of DNA methylation at 5'LTR of latent HIV-1 in CD4**  
1060 **memory T cells upon the inhibition of UTX by GSK-J4**

1061 (A) The map of CpG dinucleotides (numbered from 1 to 9) relative to HIV-1 transcription  
1062 start site along the 5'LTR CpG cluster. (B) The average DNA methylation (as %) of CpGs  
1063 and the percentage DNA methylation at CpG island 1 of the 5'LTR CpG cluster from CD4+  
1064 memory T cells treated with the indicated concentration of GSK-J4. (C) The average DNA  
1065 methylation of CpGs and the percentage DNA methylation at the CpG island 1 at the  
1066 5'LTR CpG cluster of HIV-1 from CD4+ memory T cells induced with GSK-J4 before or  
1067 after GSK-J4 removal. Experiments were performed on 3 different donors. One-tailed  
1068 paired t-tests were performed on all experiments, \*  $p < 0.05$ , ns: not statistically significant.  
1069 Note: different HIV-1 donors were utilized for this experiment than those utilized in Figure  
1070 8B.

1071 **Supporting Information**

1072 **S1 Fig. Flow cytometry assay for latency reversal in E4 cells.**

1073 Representative FACS measuring d2EGFP expression in E4 cells are shown for cells were  
1074 pretreated with increasing concentrations of GSK-J4 for 24 hours and stimulated with  
1075 SAHA (2  $\mu$ M) or TNF $\alpha$  (10 ng/ml) overnight.

1076

1077 **S2 Fig. GSK-J4 inhibits the reactivation of latent HIV-1 by SAHA & IL15 or TCR**  
1078 **stimulation in Th17 primary cells.**

1079 (A) Experimental design. (B) Flow cytometry measuring the reactivation of HIV-1 in Th17  
1080 cells by the combination of SAHA (1  $\mu$ M) and IL15 (10 ng/ml) or Human T-Activator  
1081 CD3/CD28 Dynabeads in the presence of increasing concentrations of GSK-J4. Cells  
1082 were pretreated for 48 hours with GSK-J4, then further stimulated overnight with SAHA  
1083 & IL15 or Human T-Activator CD3/CD28 Dynabeads with the ratio of 25  $\mu$ l of beads  
1084 per 1 million cells.

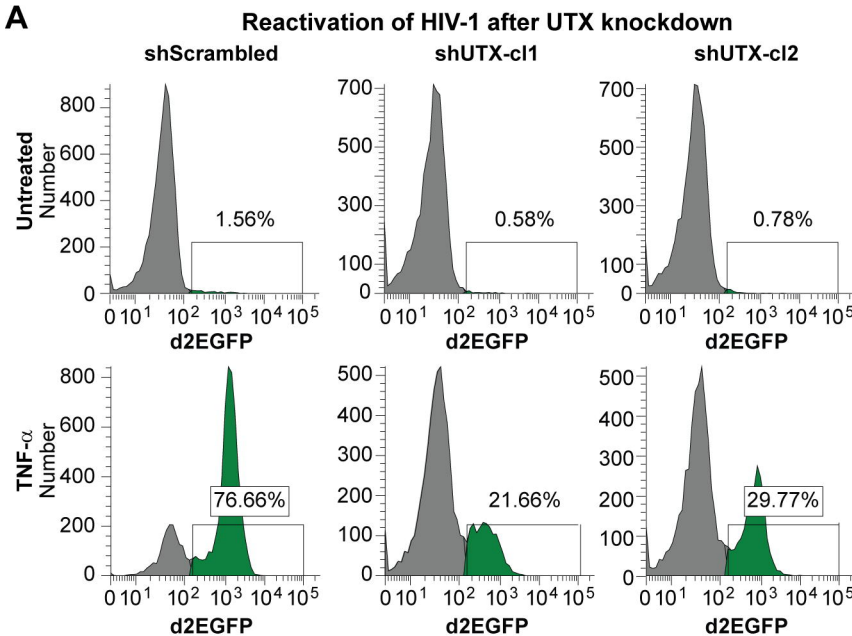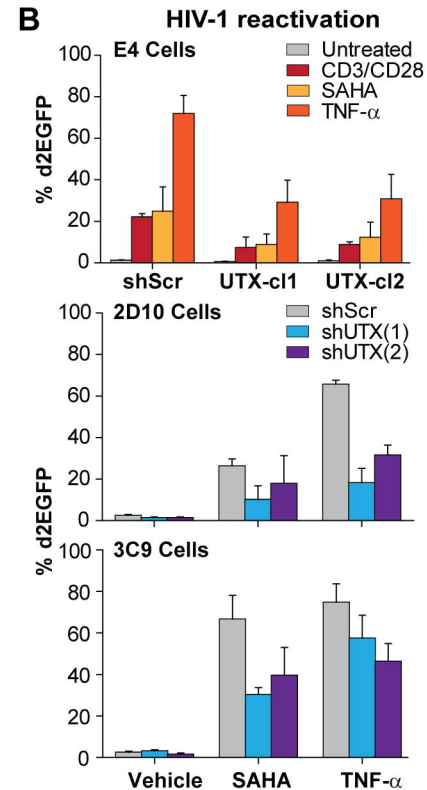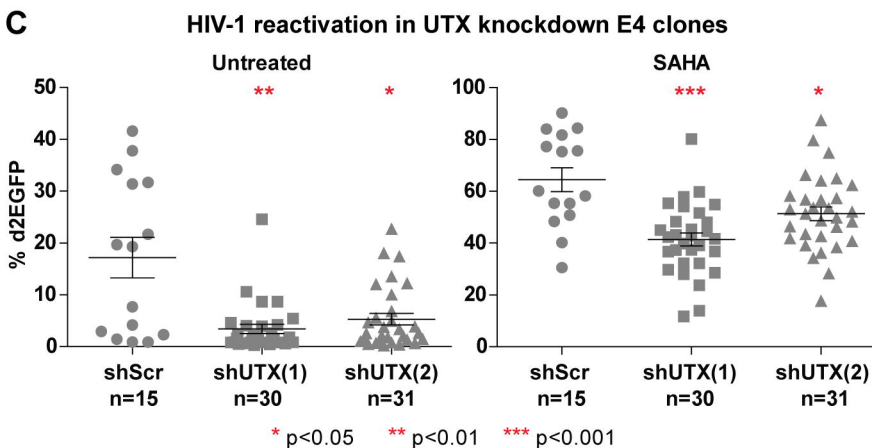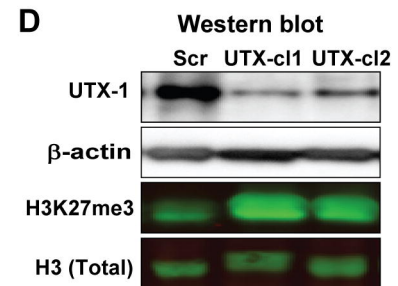

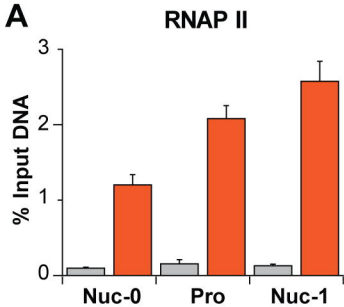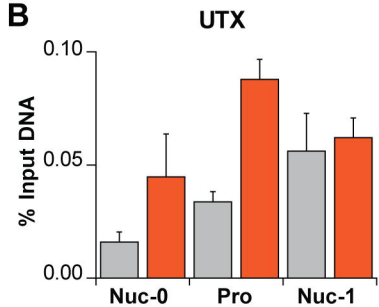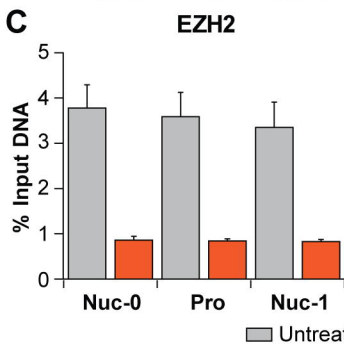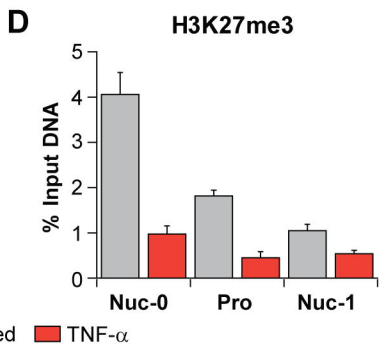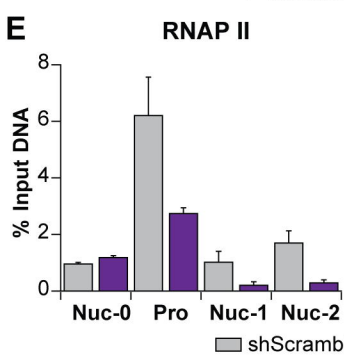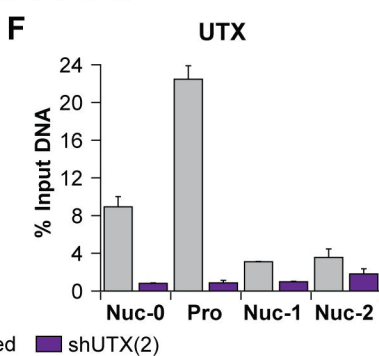



**A Inhibition of HIV reactivation by GSK-J4**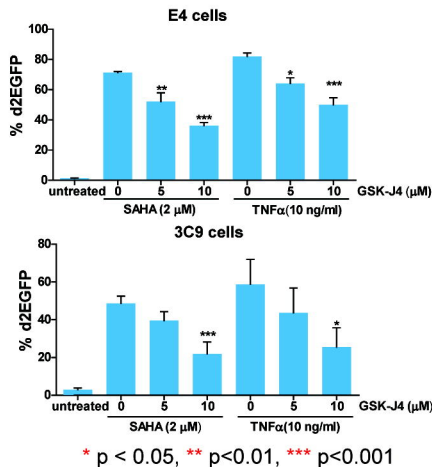**B ChIP analysis RNAP II**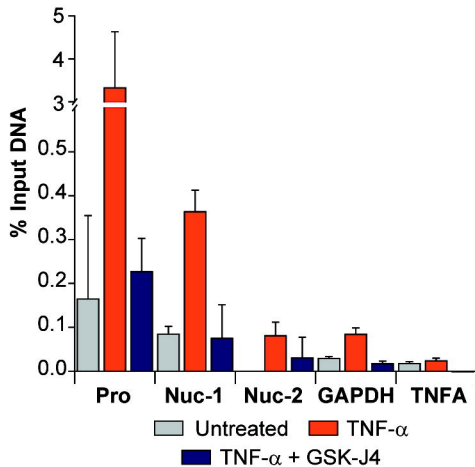**C ChIP analysis H3K4me3**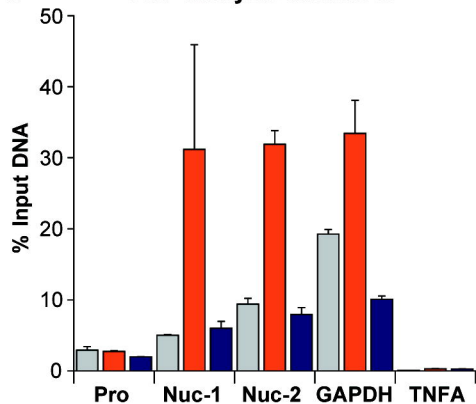**D ChIP analysis H3K27me3**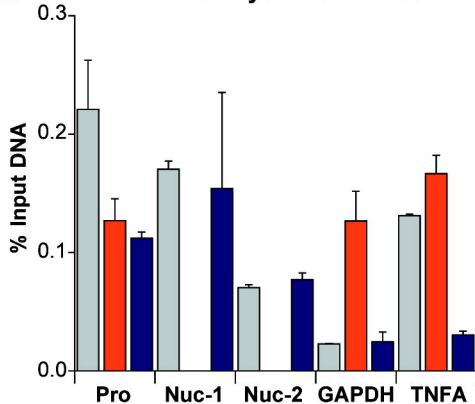

**A****Western blots**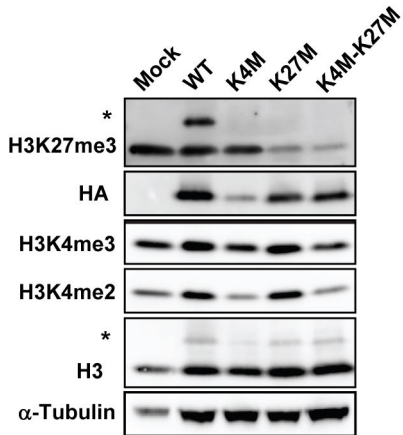**B****Ectopic expression of H3.3 mutants**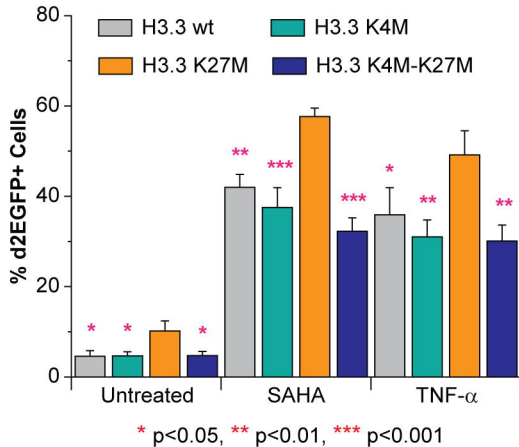

# Mapping of CpGIs and primers used for MeDIP along HIV-1 genome

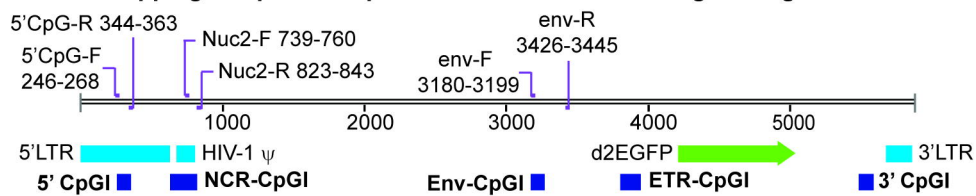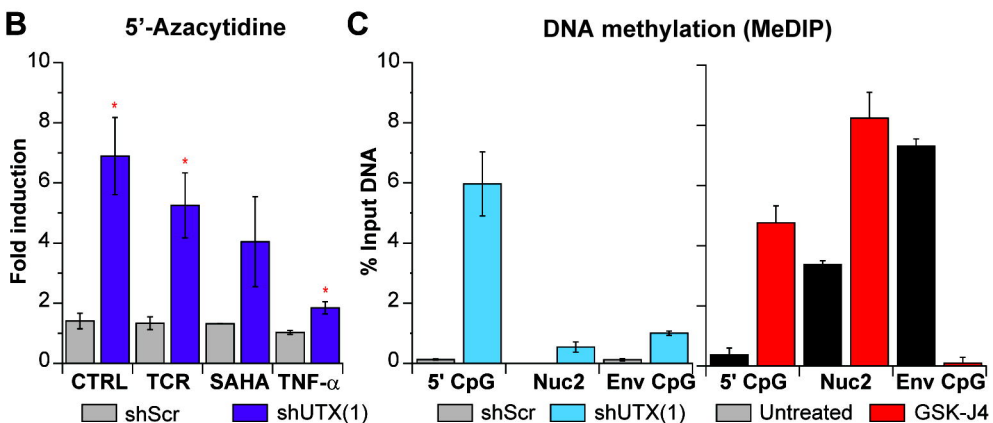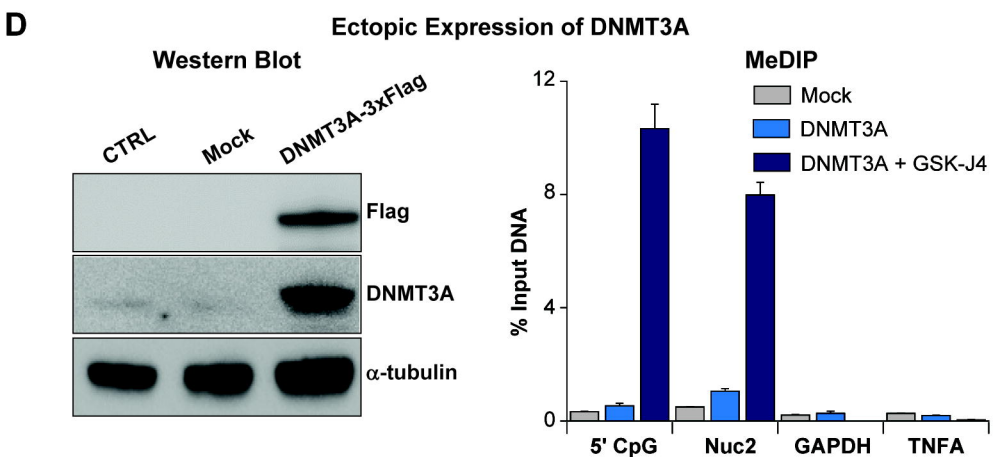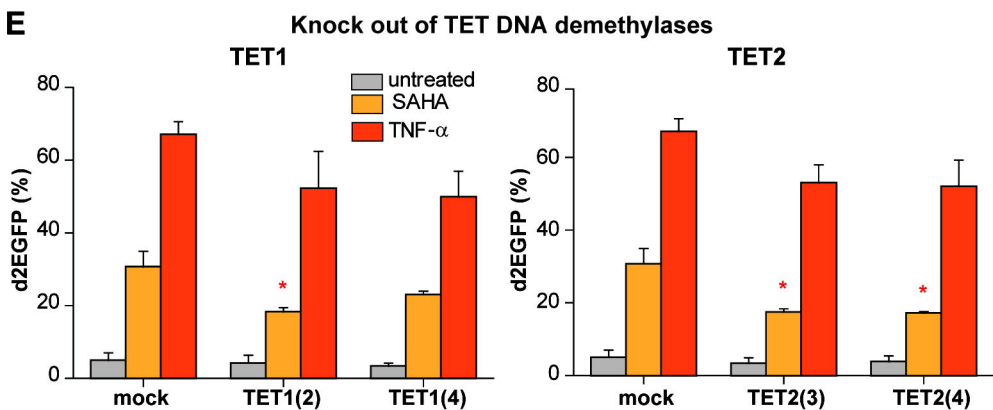

\* p < 0.05

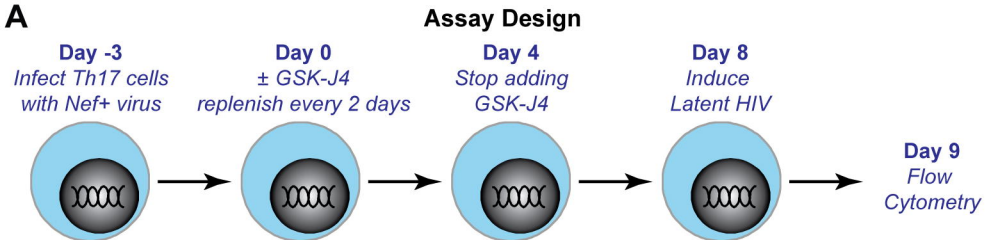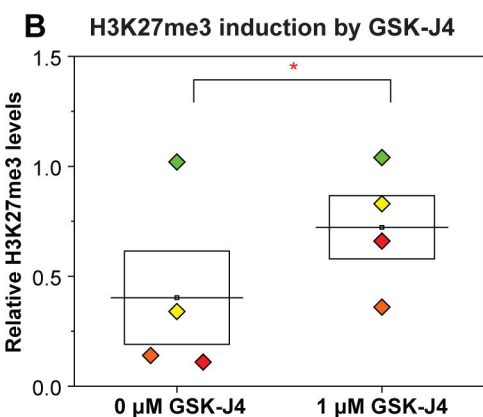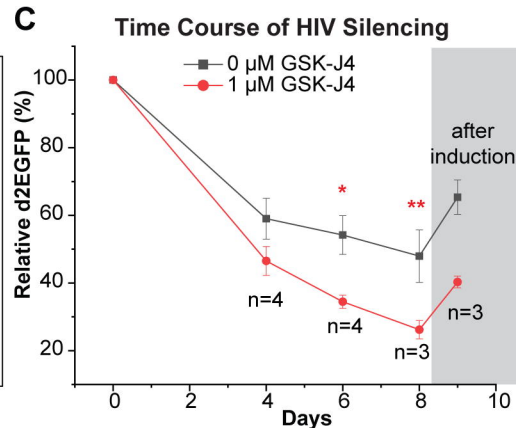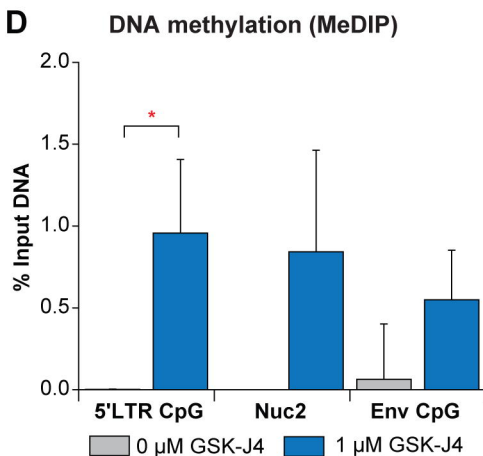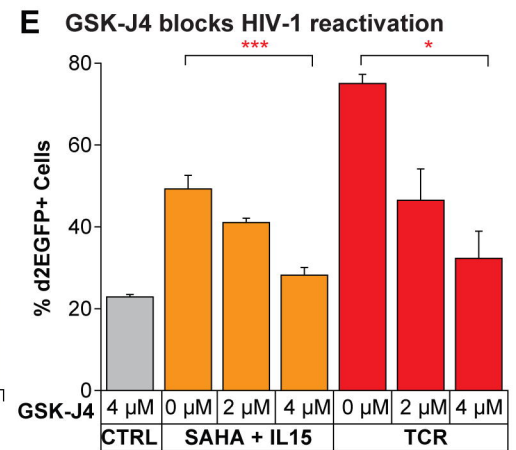

\* p < 0.05, \*\* p < 0.01, \*\*\* p < 0.001

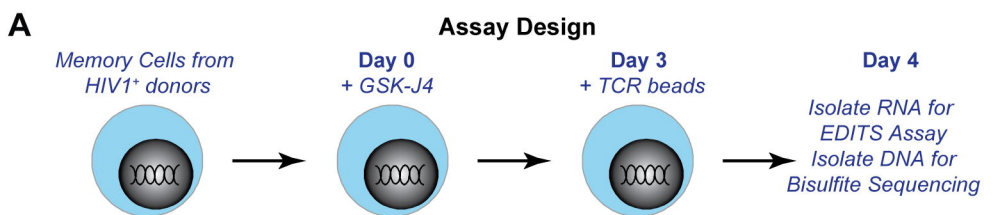

**B HIV-1 reactivation (EDITS Assay)**

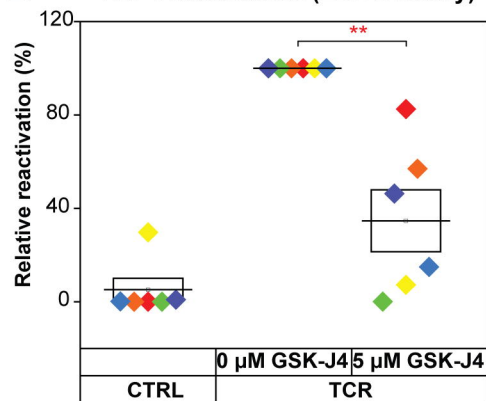

**C CD69 Expression**

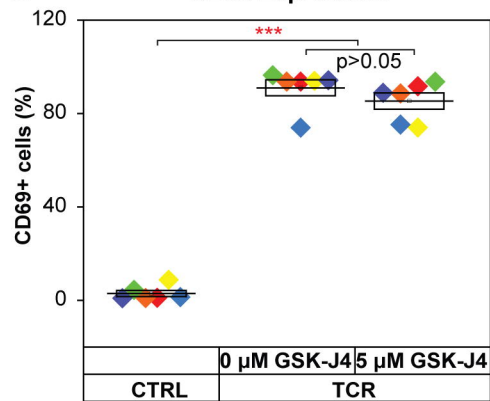

\*\* p<0.01, \*\*\* p<0.001

**D H3K27me3 Expression**

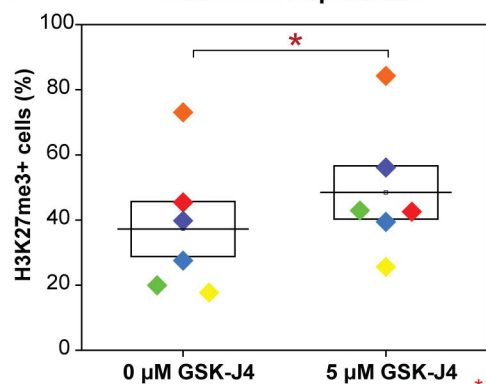

\* p<0.05

**E Viability (PI staining)**

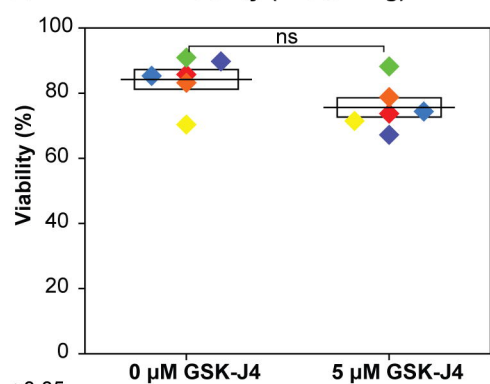

**A** Mapping of CpG dinucleotides along 5'LTR CpG of HIV-1 by bisulfite sequencing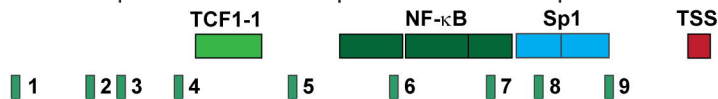**B** Induction of HIV DNA methylation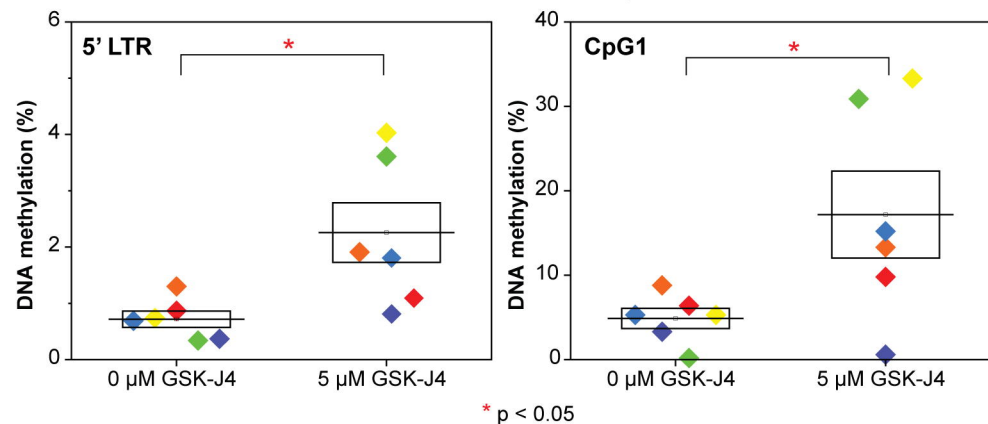**C** DNA methylation at 5'LTR upon GSK-J4 withdrawal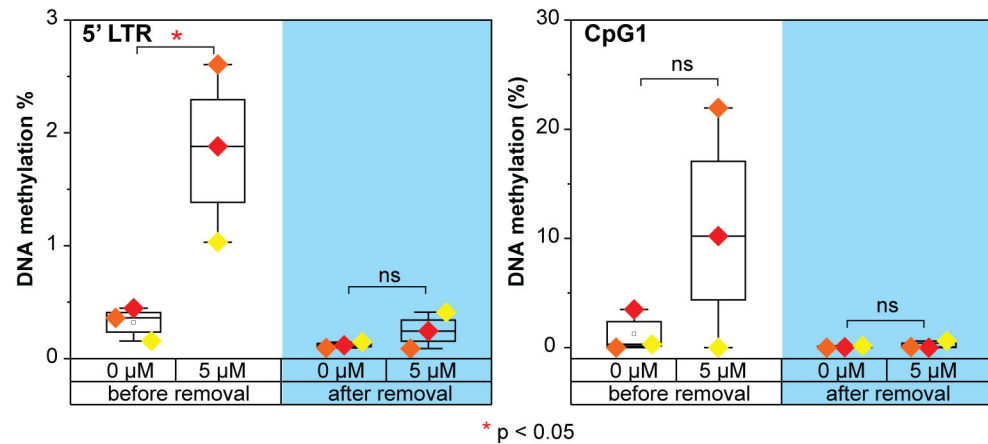

# Inhibition of UTX1 demethylase activity by GSK-J4 prevents HIV-1 reactivation in Jurkat T cells

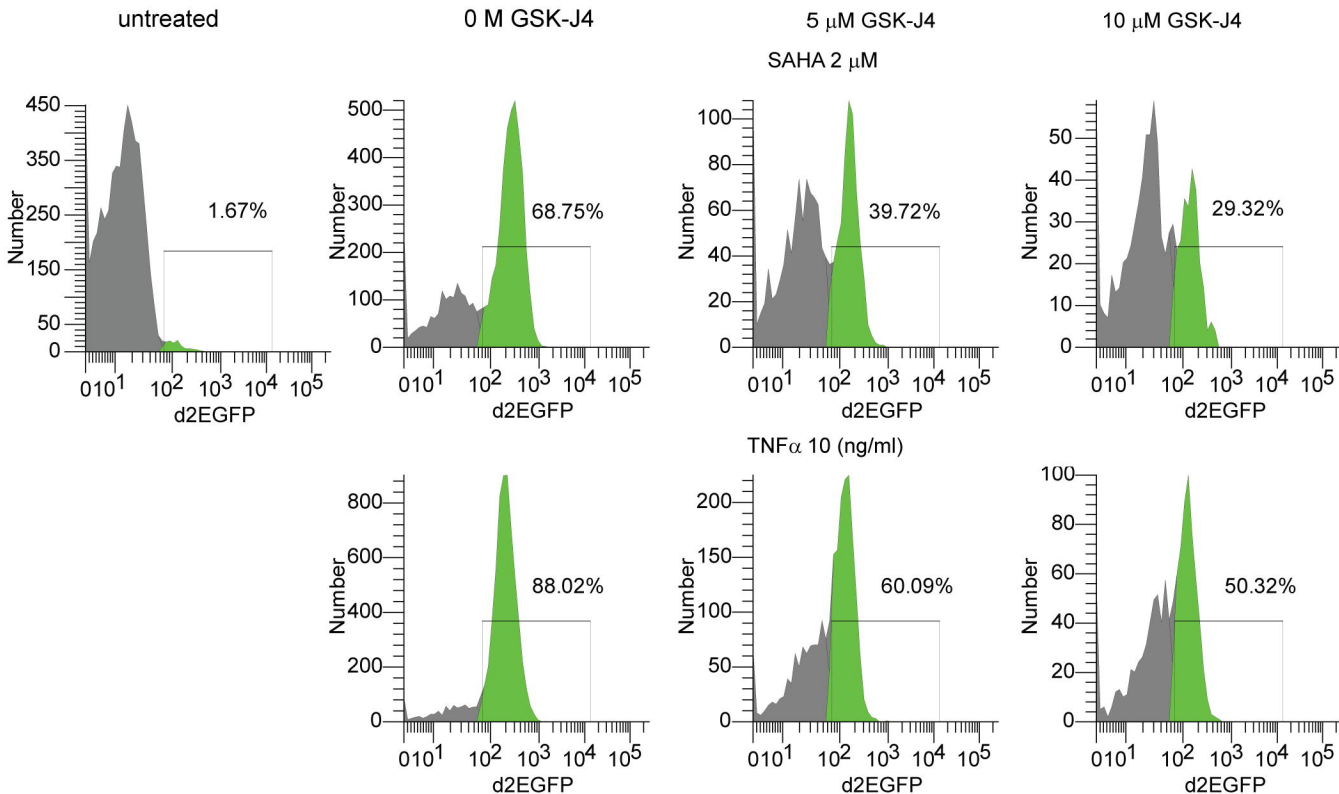

## A. Experimental design

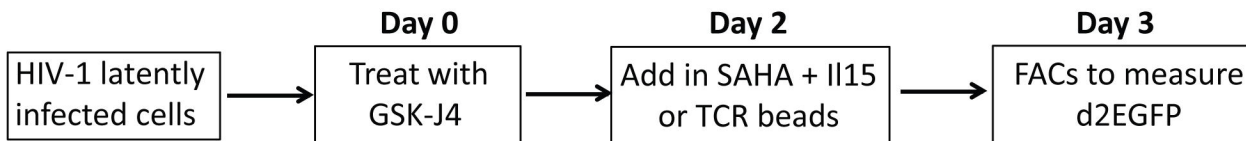

## B. FACs analysis measuring HIV-1 reactivation in Th17 cells treated with GSK-J4

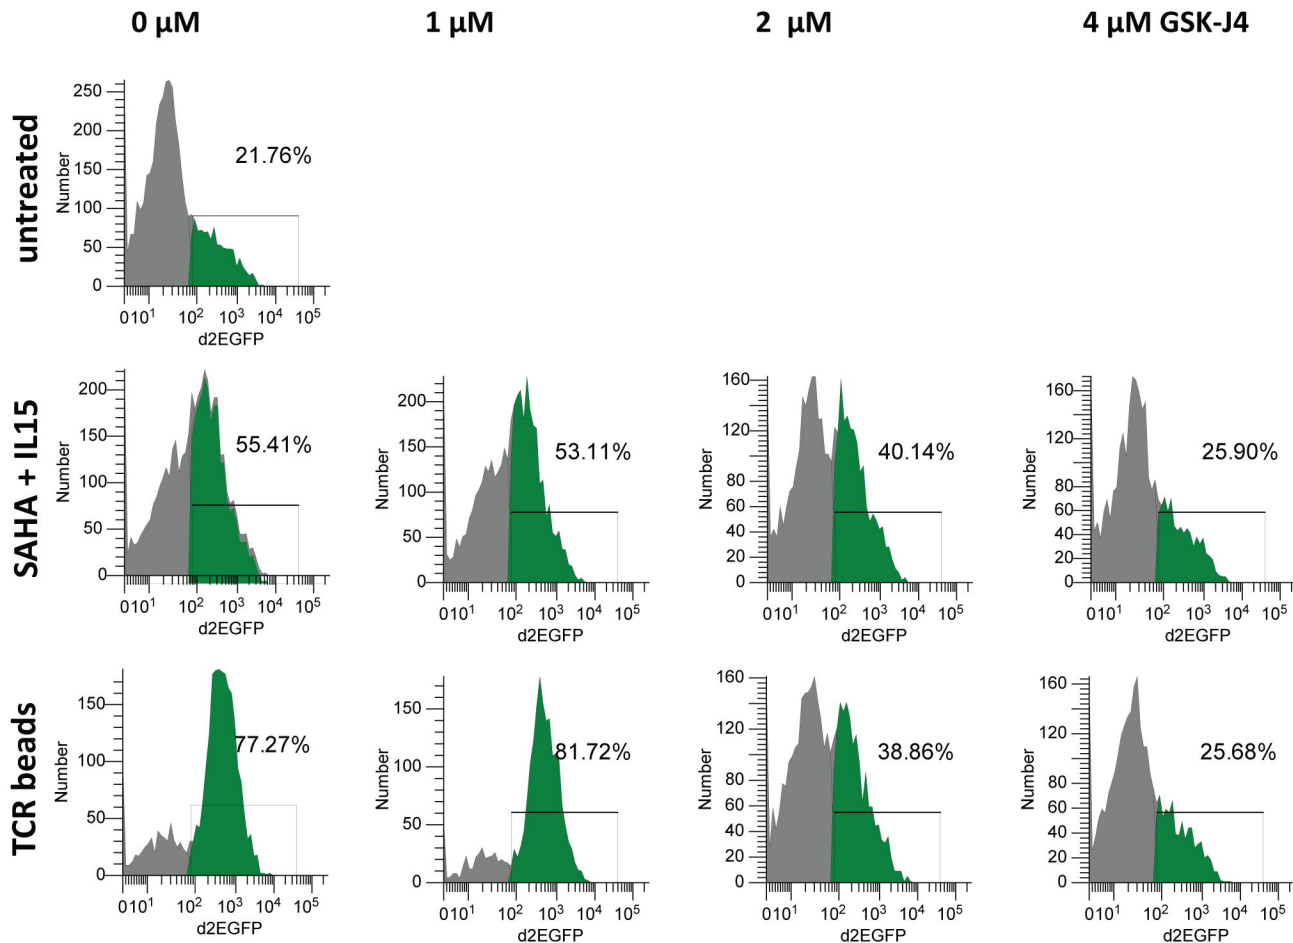

Source: http://biorxiv.org/content/10.1101/2021.08.02.454353v1.full.pdf
